# Supplementary material
Source: MDPI journal article supplement (https://www.mdpi.com/1996-1073/13/19/5149)
Supplement: s1 [file s1]

## Rubitherm RT-9HC

The heat capacity data is taken from the PCM's datasheet provided by Rubitherm GmbH (Berlin, Germany). The data was generated by 3-layer-calorimetry and is given as stored heat in 1.0 K intervals (first figure). Spline interpolation is used to identify the phase fraction-temperature function  $\xi(T)$ . The phase transition model (second figure) uses the values for  $c_p^l$ ,  $c_p^s$  and  $\Delta h_t$  as given in the date sheet.

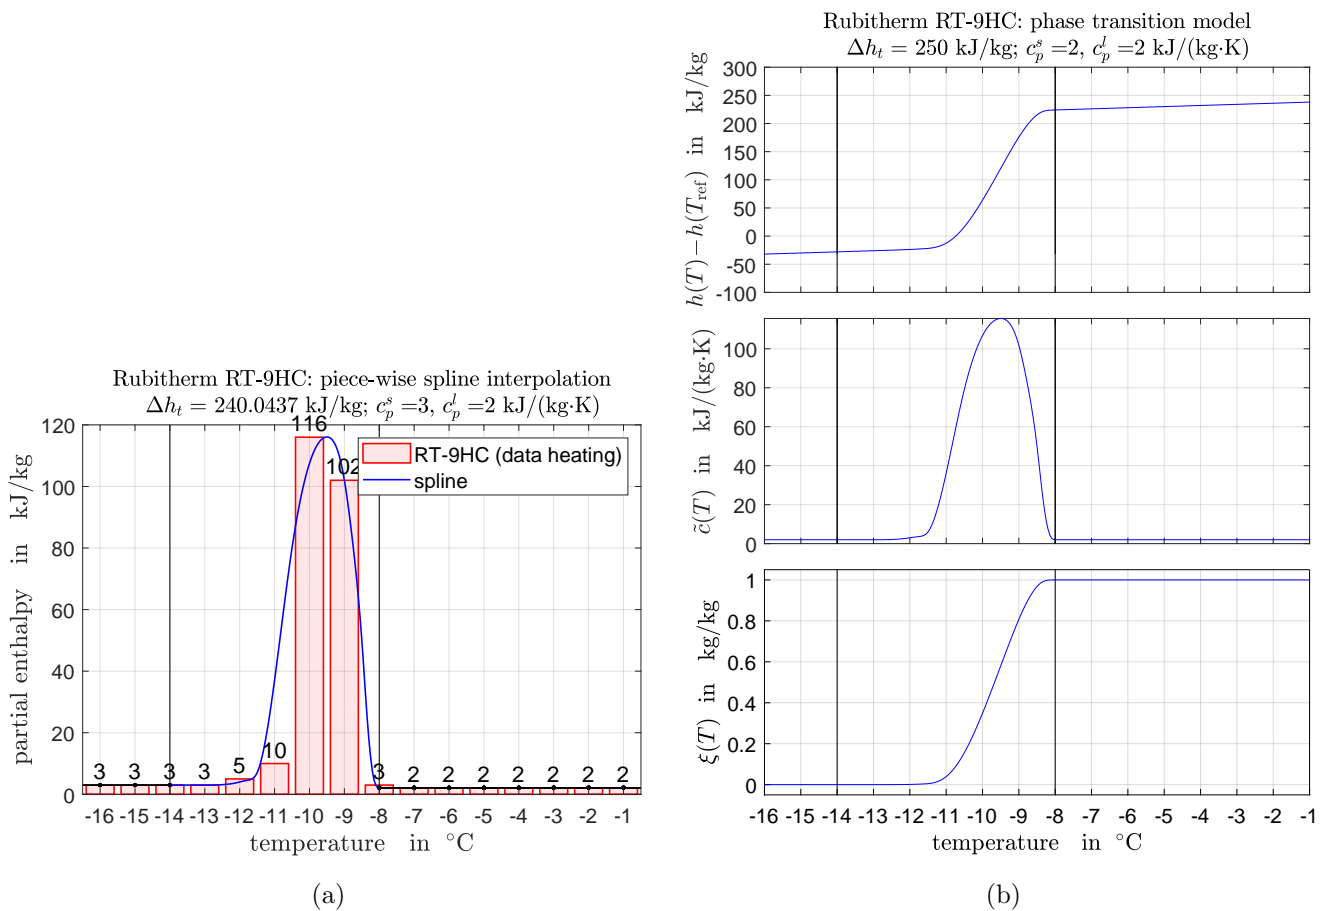

Figure 1: Identified phase transition models for heating for Rubitherm RT-9HC.

<sup>1</sup>Barz, T.; Krämer, J.; Emhofer, J. Identification of Phase Fraction–Temperature Curves from Heat Capacity Data for Numerical Modeling of Heat Transfer in Commercial Paraffin Waxes. *Energies* **2020**, *13*, 5149.

## Rubitherm RT-4

The heat capacity data is taken from the PCM's datasheet provided by Rubitherm GmbH (Berlin, Germany). The data was generated by 3-layer-calorimetry and is given as stored heat in 1.0 K intervals (first figure). Spline interpolation is used to identify the phase fraction-temperature function  $\xi(T)$ . The phase transition model (second figure) uses the values for  $c_p^l$ ,  $c_p^s$  and  $\Delta h_t$  as given in the date sheet.

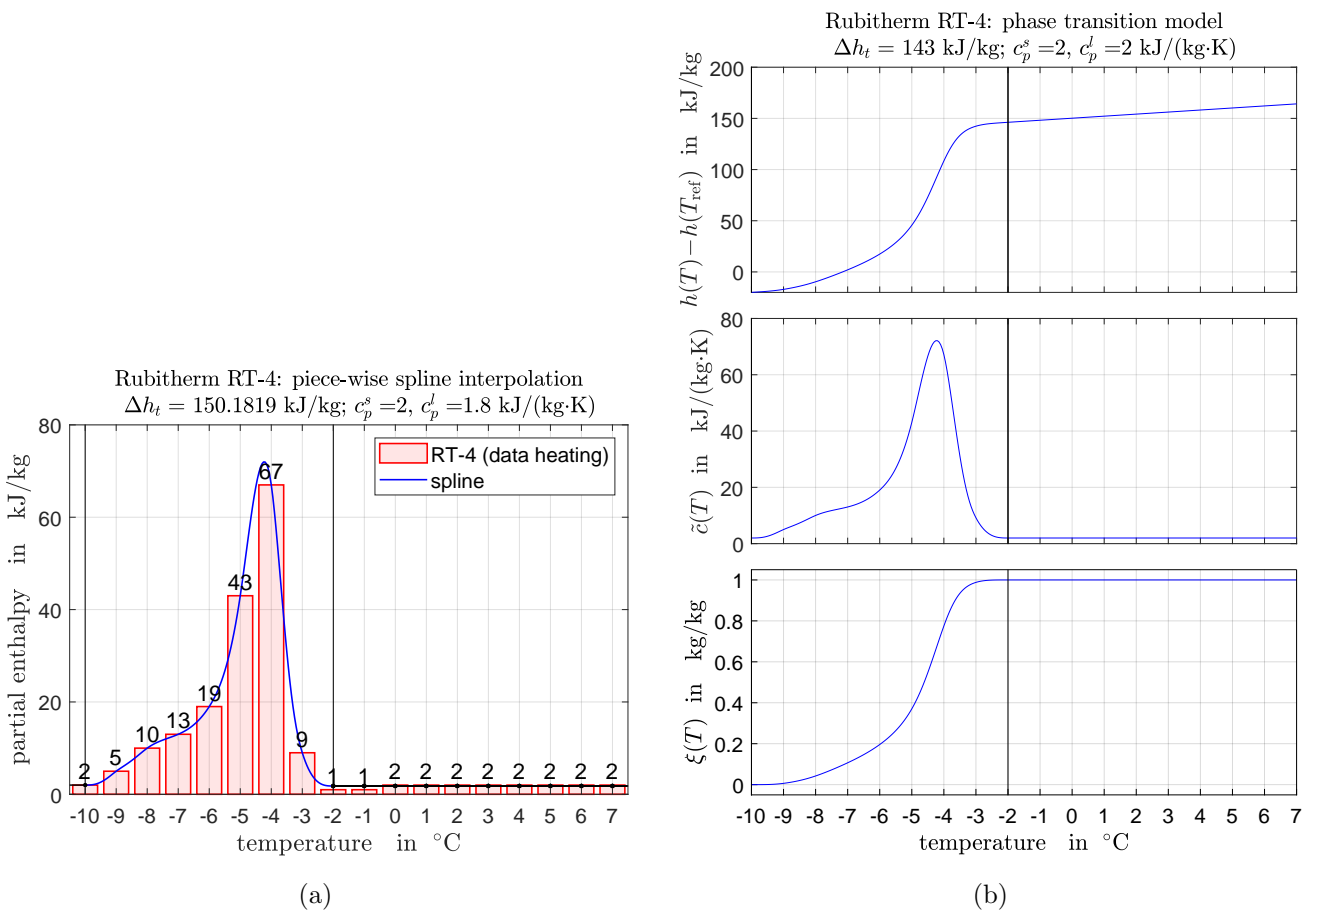

Figure 2: Identified phase transition models for heating for Rubitherm RT-4.

<sup>1</sup>Barz, T.; Krämer, J.; Emhofer, J. Identification of Phase Fraction–Temperature Curves from Heat Capacity Data for Numerical Modeling of Heat Transfer in Commercial Paraffin Waxes. *Energies* **2020**, *13*, 5149.

## Rubitherm RT0

The heat capacity data is taken from the PCM's datasheet provided by Rubitherm GmbH (Berlin, Germany). The data was generated by 3-layer-calorimetry and is given as stored heat in 1.0 K intervals (first figure). Spline interpolation is used to identify the phase fraction-temperature function  $\xi(T)$ . The phase transition model (second figure) uses the values for  $c_p^l$ ,  $c_p^s$  and  $\Delta h_t$  as given in the date sheet.

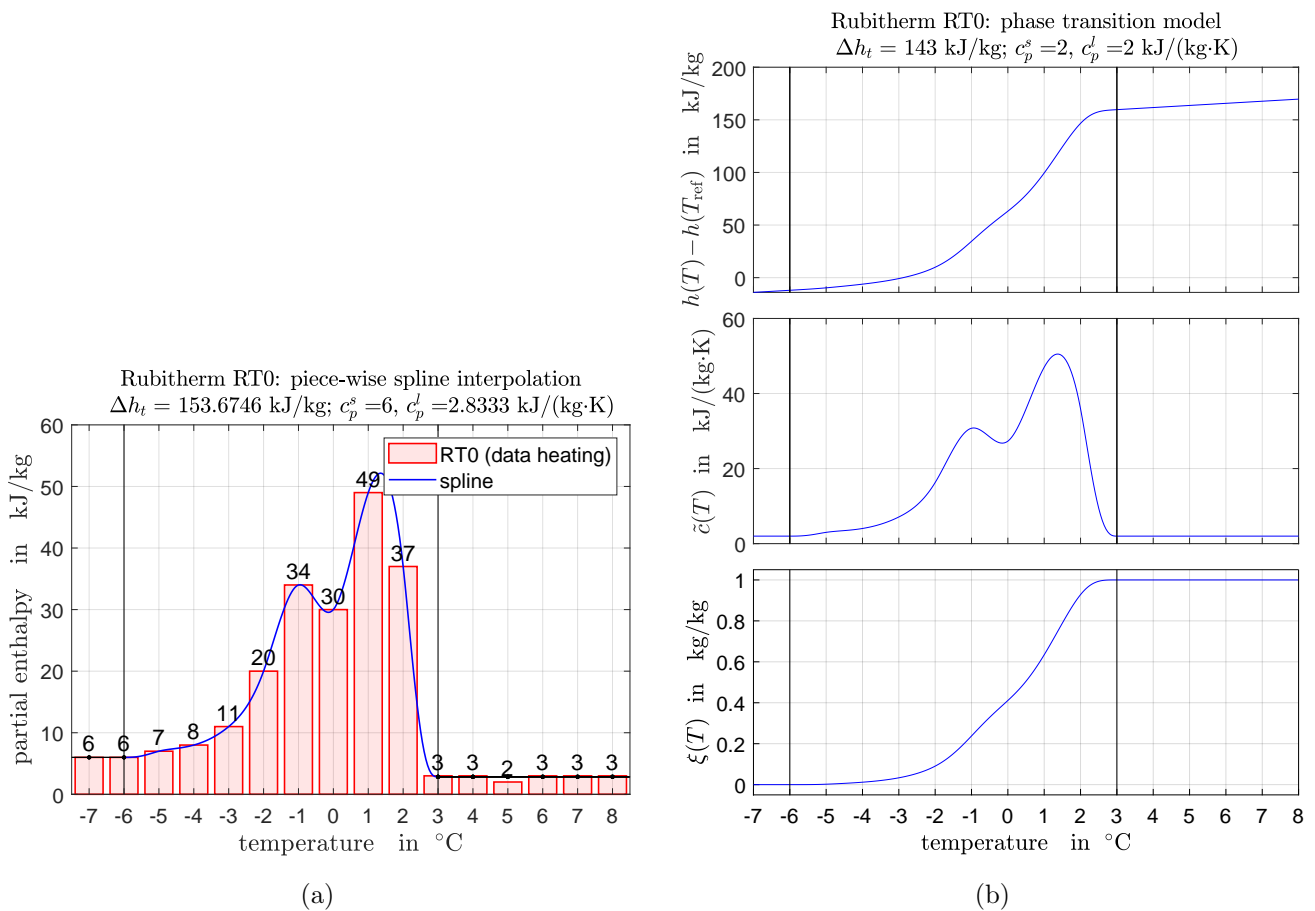

Figure 3: Identified phase transition models for heating for Rubitherm RT0.

<sup>1</sup>Barz, T.; Krämer, J.; Emhofer, J. Identification of Phase Fraction–Temperature Curves from Heat Capacity Data for Numerical Modeling of Heat Transfer in Commercial Paraffin Waxes. *Energies* **2020**, *13*, 5149.

## Rubitherm RT2HC

The heat capacity data is taken from the PCM's datasheet provided by Rubitherm GmbH (Berlin, Germany). The data was generated by 3-layer-calorimetry and is given as stored heat in 1.0 K intervals (first figure). Spline interpolation is used to identify the phase fraction-temperature function  $\xi(T)$ . The phase transition model (second figure) uses the values for  $c_p^l$ ,  $c_p^s$  and  $\Delta h_t$  as given in the date sheet.

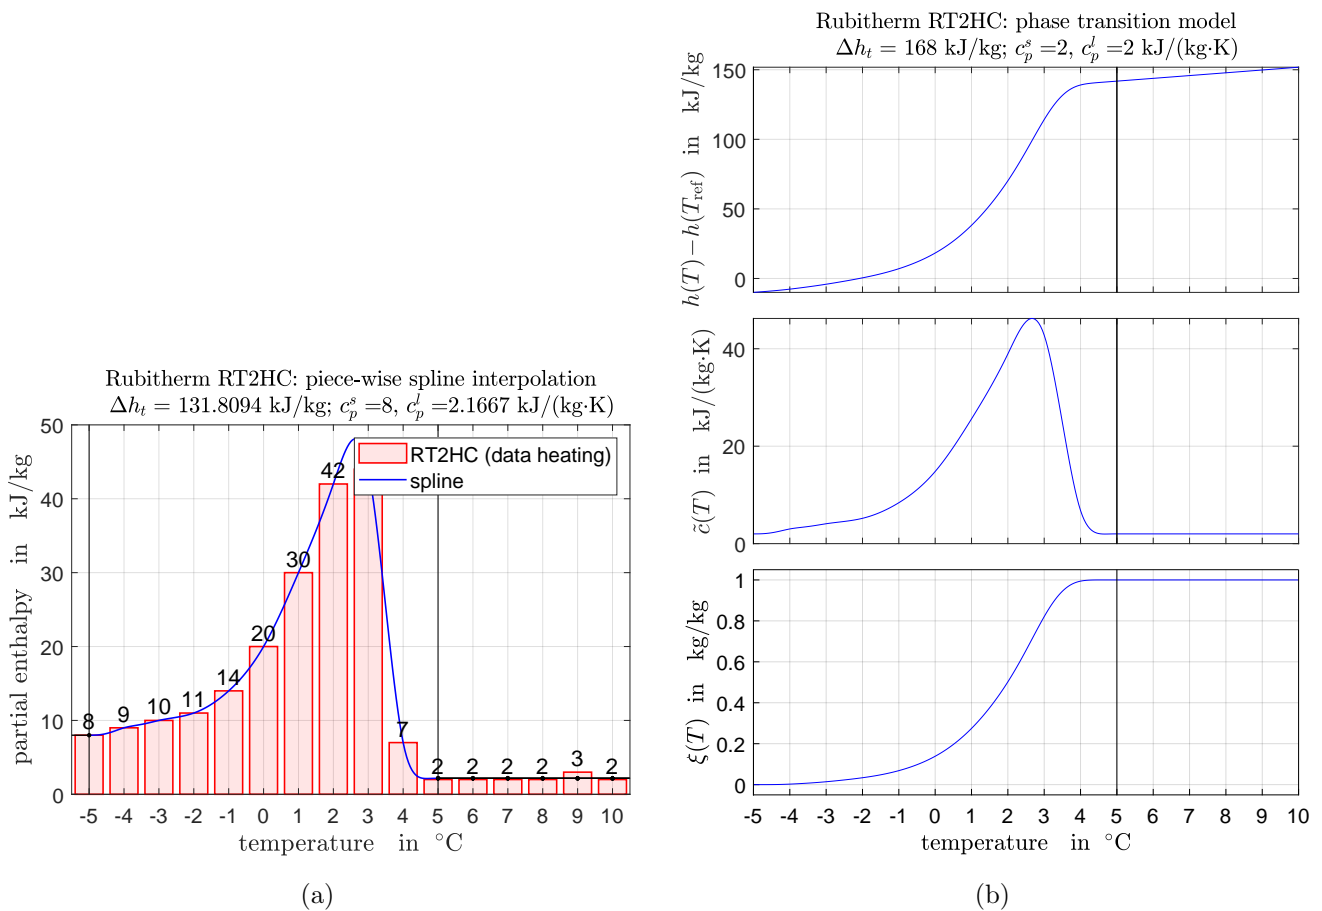

Figure 4: Identified phase transition models for heating for Rubitherm RT2HC.

<sup>1</sup>Barz, T.; Krämer, J.; Emhofer, J. Identification of Phase Fraction–Temperature Curves from Heat Capacity Data for Numerical Modeling of Heat Transfer in Commercial Paraffin Waxes. *Energies* **2020**, *13*, 5149.

## Rubitherm RT3HC

The heat capacity data is taken from the PCM's datasheet provided by Rubitherm GmbH (Berlin, Germany). The data was generated by 3-layer-calorimetry and is given as stored heat in 1.0 K intervals (first figure). Spline interpolation is used to identify the phase fraction-temperature function  $\xi(T)$ . The phase transition model (second figure) uses the values for  $c_p^l$ ,  $c_p^s$  and  $\Delta h_t$  as given in the date sheet.

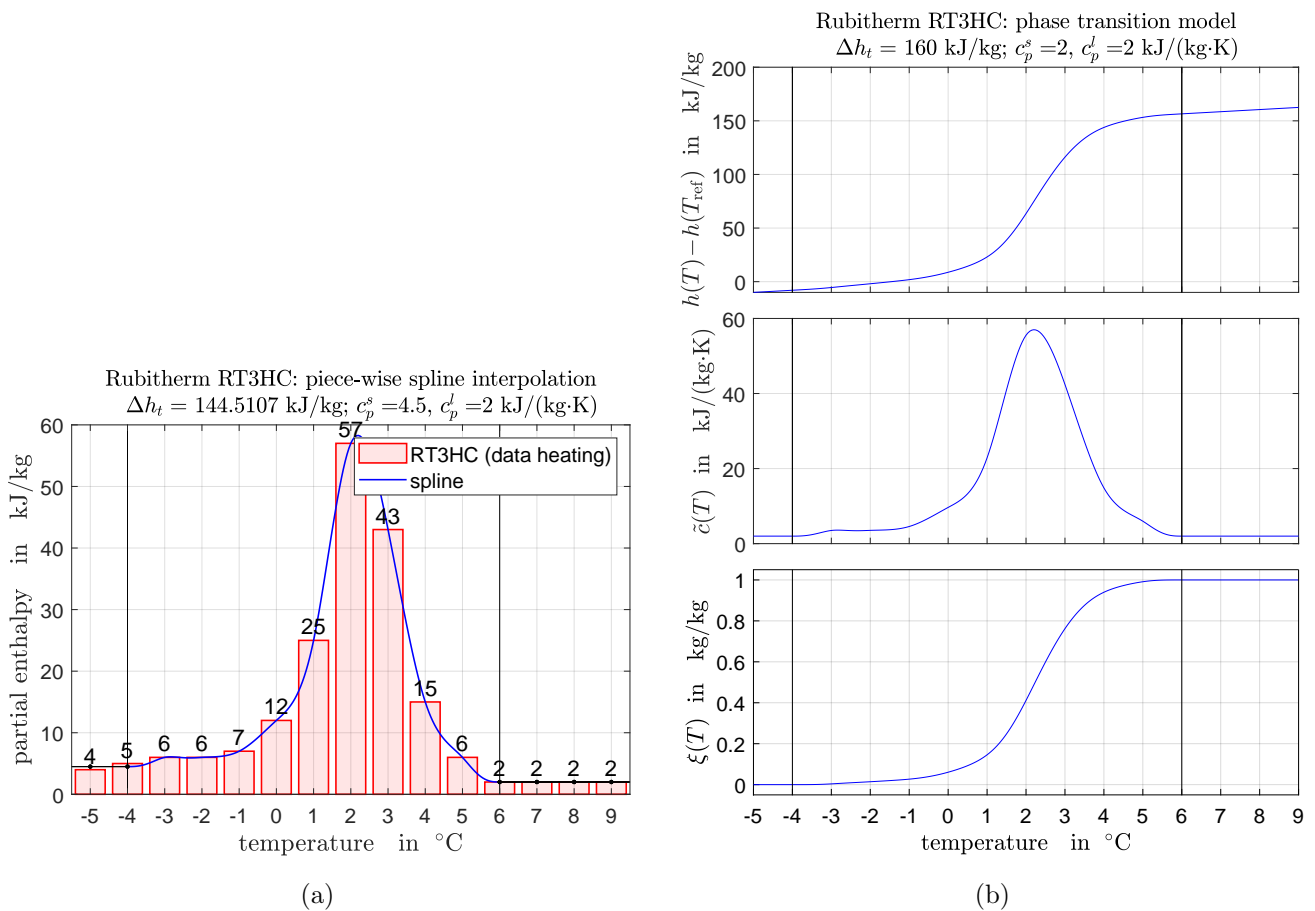

Figure 5: Identified phase transition models for heating for Rubitherm RT3HC.

<sup>1</sup>Barz, T.; Krämer, J.; Emhofer, J. Identification of Phase Fraction–Temperature Curves from Heat Capacity Data for Numerical Modeling of Heat Transfer in Commercial Paraffin Waxes. *Energies* **2020**, *13*, 5149.

## Rubitherm RT4

The heat capacity data is taken from the PCM's datasheet provided by Rubitherm GmbH (Berlin, Germany). The data was generated by 3-layer-calorimetry and is given as stored heat in 1.0 K intervals (first figure). Spline interpolation is used to identify the phase fraction-temperature function  $\xi(T)$ . The phase transition model (second figure) uses the values for  $c_p^l$ ,  $c_p^s$  and  $\Delta h_t$  as given in the date sheet.

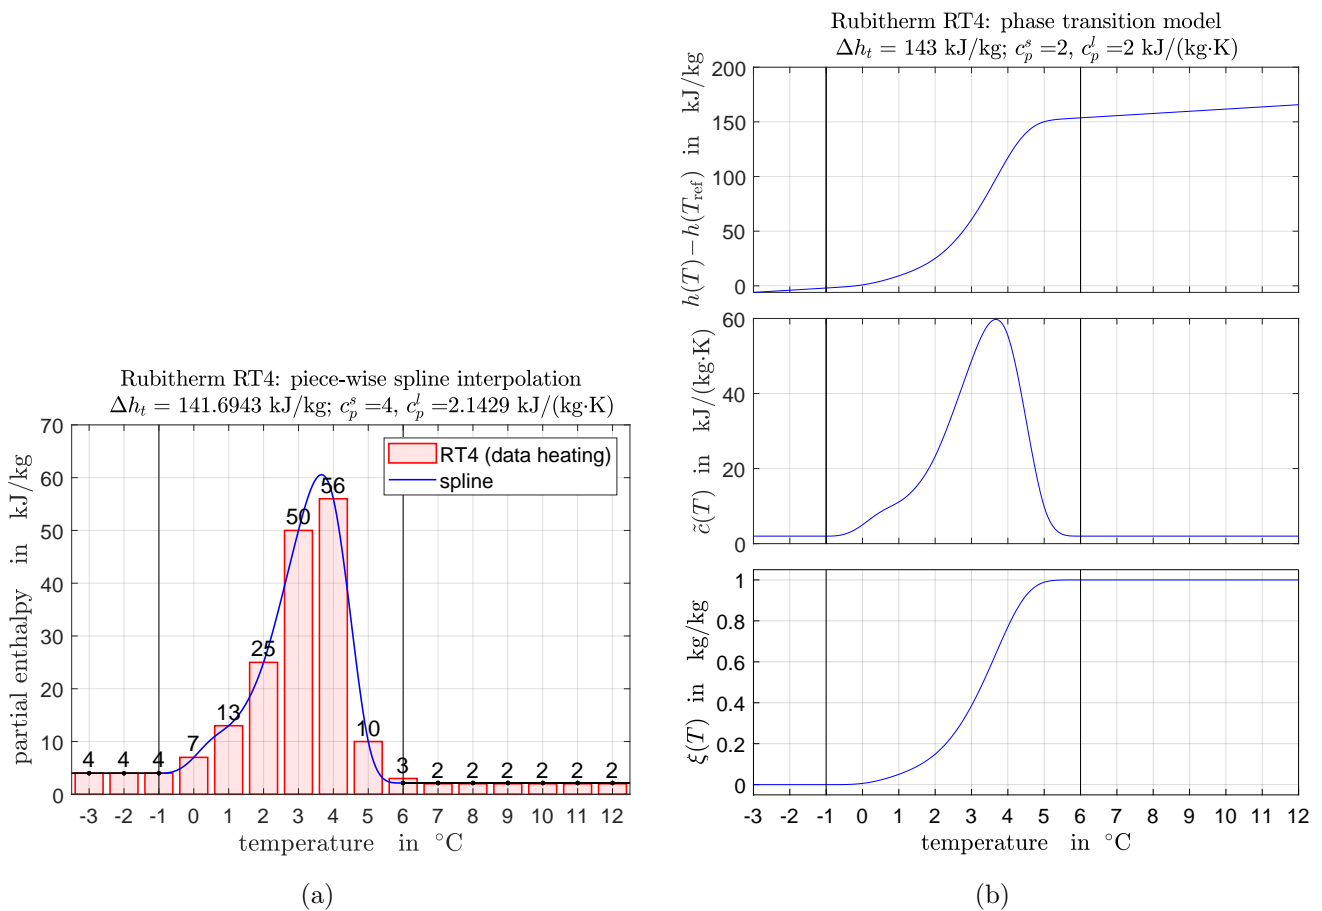

Figure 6: Identified phase transition models for heating for Rubitherm RT4.

<sup>1</sup>Barz, T.; Krämer, J.; Emhofer, J. Identification of Phase Fraction–Temperature Curves from Heat Capacity Data for Numerical Modeling of Heat Transfer in Commercial Paraffin Waxes. *Energies* **2020**, *13*, 5149.

## Rubitherm RT5

The heat capacity data is taken from the PCM's datasheet provided by Rubitherm GmbH (Berlin, Germany). The data was generated by 3-layer-calorimetry and is given as stored heat in 1.0 K intervals (first figure). Spline interpolation is used to identify the phase fraction-temperature function  $\xi(T)$ . The phase transition model (second figure) uses the values for  $c_p^l$ ,  $c_p^s$  and  $\Delta h_t$  as given in the date sheet.

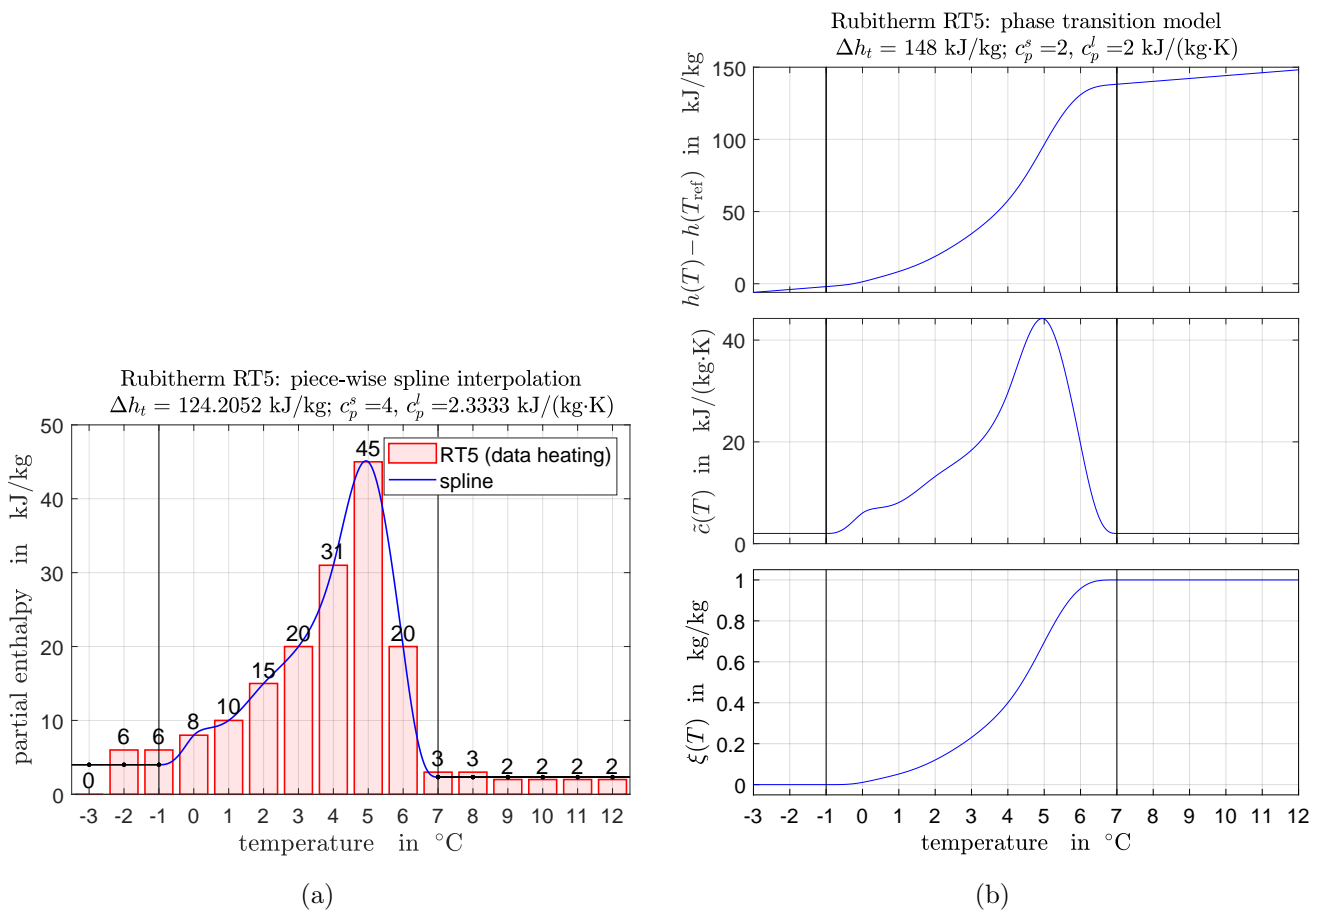

Figure 7: Identified phase transition models for heating for Rubitherm RT5.

<sup>1</sup>Barz, T.; Krämer, J.; Emhofer, J. Identification of Phase Fraction–Temperature Curves from Heat Capacity Data for Numerical Modeling of Heat Transfer in Commercial Paraffin Waxes. *Energies* **2020**, *13*, 5149.

## Rubitherm RT5HC

The heat capacity data is taken from the PCM's datasheet provided by Rubitherm GmbH (Berlin, Germany). The data was generated by 3-layer-calorimetry and is given as stored heat in 1.0 K intervals (first figure). Spline interpolation is used to identify the phase fraction-temperature function  $\xi(T)$ . The phase transition model (second figure) uses the values for  $c_p^l$ ,  $c_p^s$  and  $\Delta h_t$  as given in the date sheet.

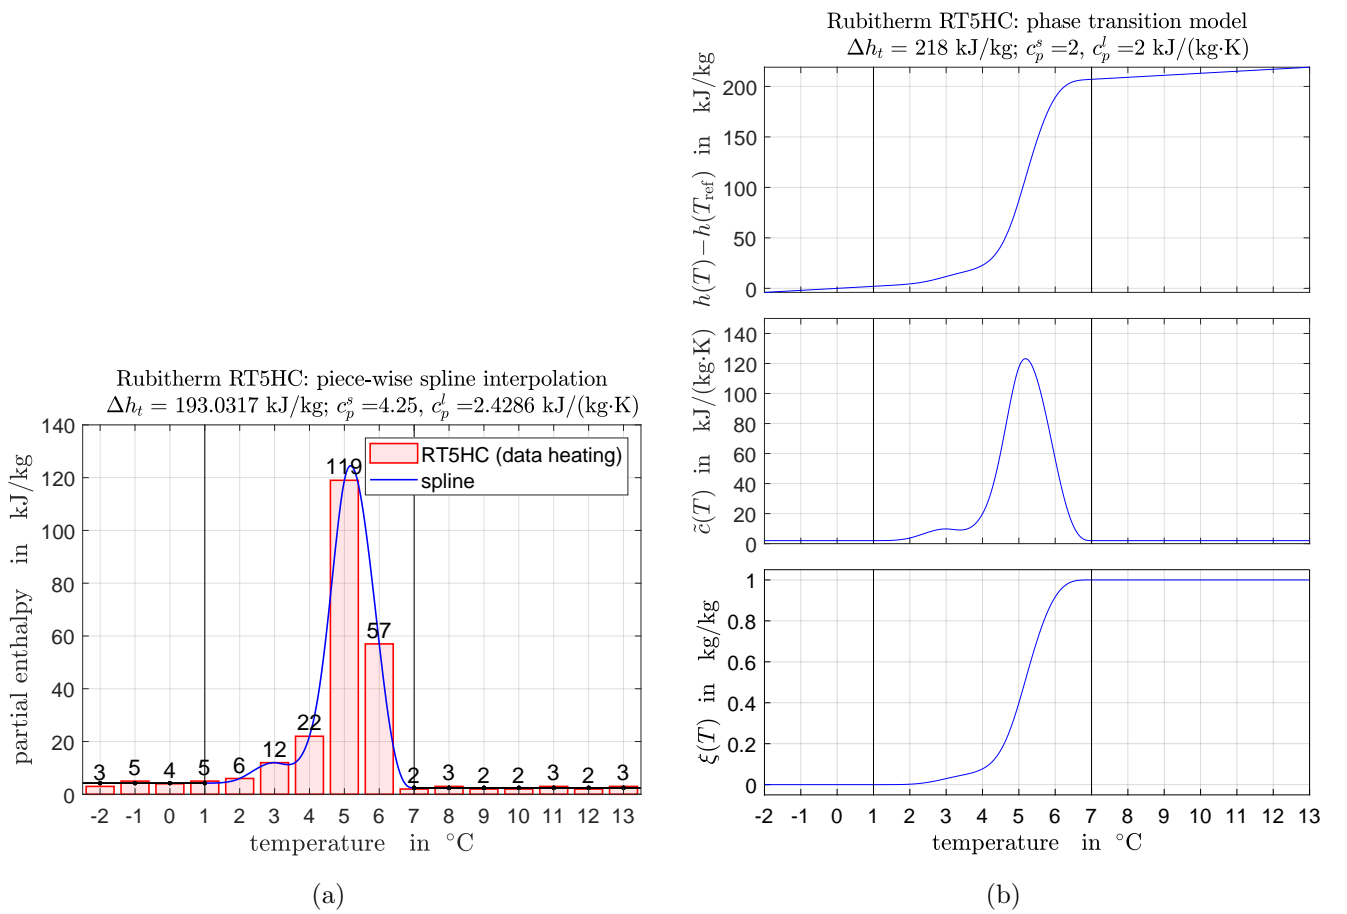

Figure 8: Identified phase transition models for heating for Rubitherm RT5HC.

<sup>1</sup>Barz, T.; Krämer, J.; Emhofer, J. Identification of Phase Fraction–Temperature Curves from Heat Capacity Data for Numerical Modeling of Heat Transfer in Commercial Paraffin Waxes. *Energies* **2020**, *13*, 5149.



## Rubitherm RT8

The heat capacity data is taken from the PCM's datasheet provided by Rubitherm GmbH (Berlin, Germany). The data was generated by 3-layer-calorimetry and is given as stored heat in 1.0 K intervals (first figure). Spline interpolation is used to identify the phase fraction-temperature function  $\xi(T)$ . The phase transition model (second figure) uses the values for  $c_p^l$ ,  $c_p^s$  and  $\Delta h_t$  as given in the date sheet.

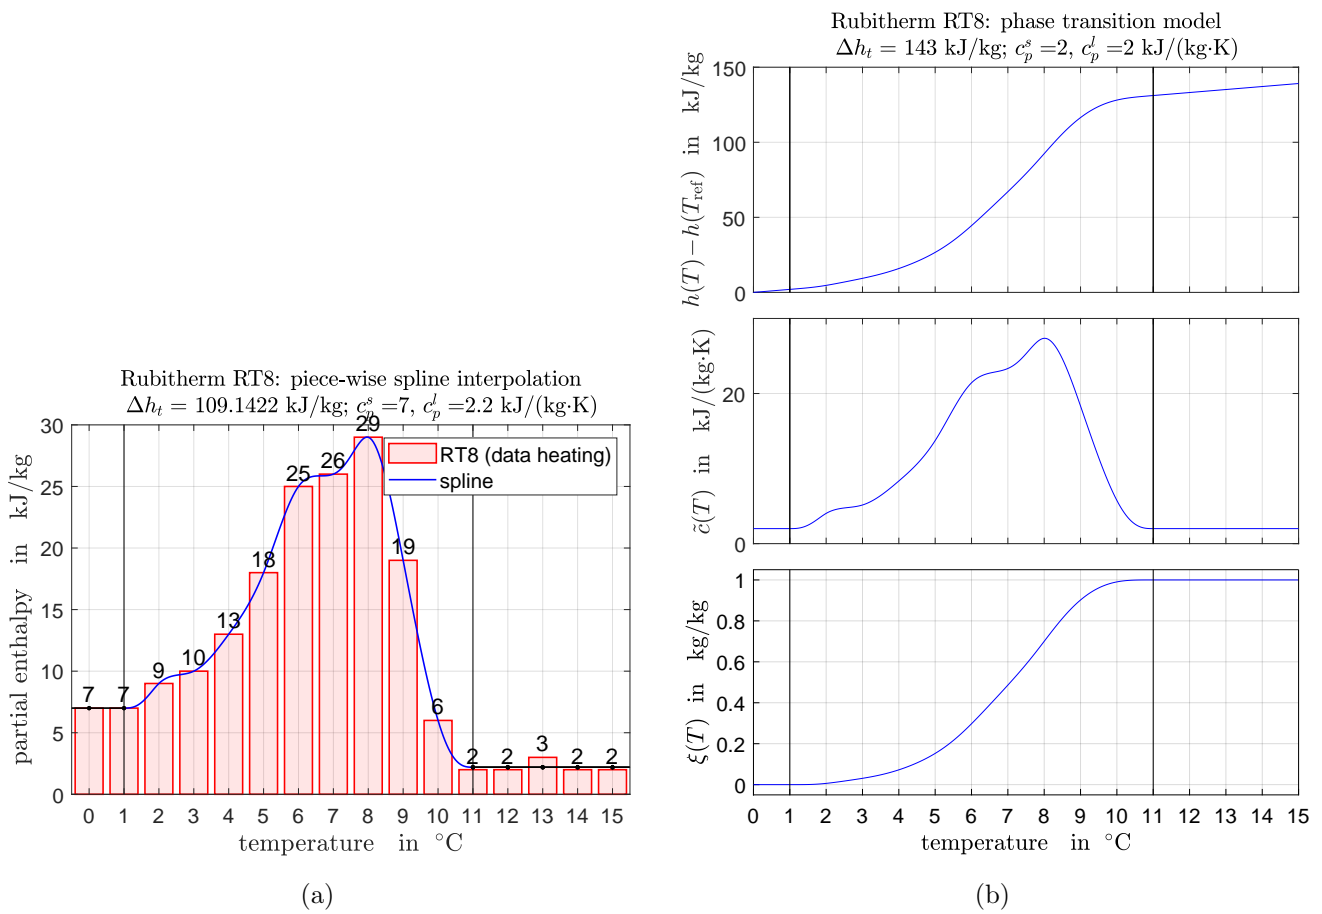

Figure 9: Identified phase transition models for heating for Rubitherm RT8.

<sup>1</sup>Barz, T.; Krämer, J.; Emhofer, J. Identification of Phase Fraction–Temperature Curves from Heat Capacity Data for Numerical Modeling of Heat Transfer in Commercial Paraffin Waxes. *Energies* **2020**, *13*, 5149.

## Rubitherm RT8HC

The heat capacity data is taken from the PCM's datasheet provided by Rubitherm GmbH (Berlin, Germany). The data was generated by 3-layer-calorimetry and is given as stored heat in 1.0 K intervals (first figure). Spline interpolation is used to identify the phase fraction-temperature function  $\xi(T)$ . The phase transition model (second figure) uses the values for  $c_p^l$ ,  $c_p^s$  and  $\Delta h_t$  as given in the date sheet.

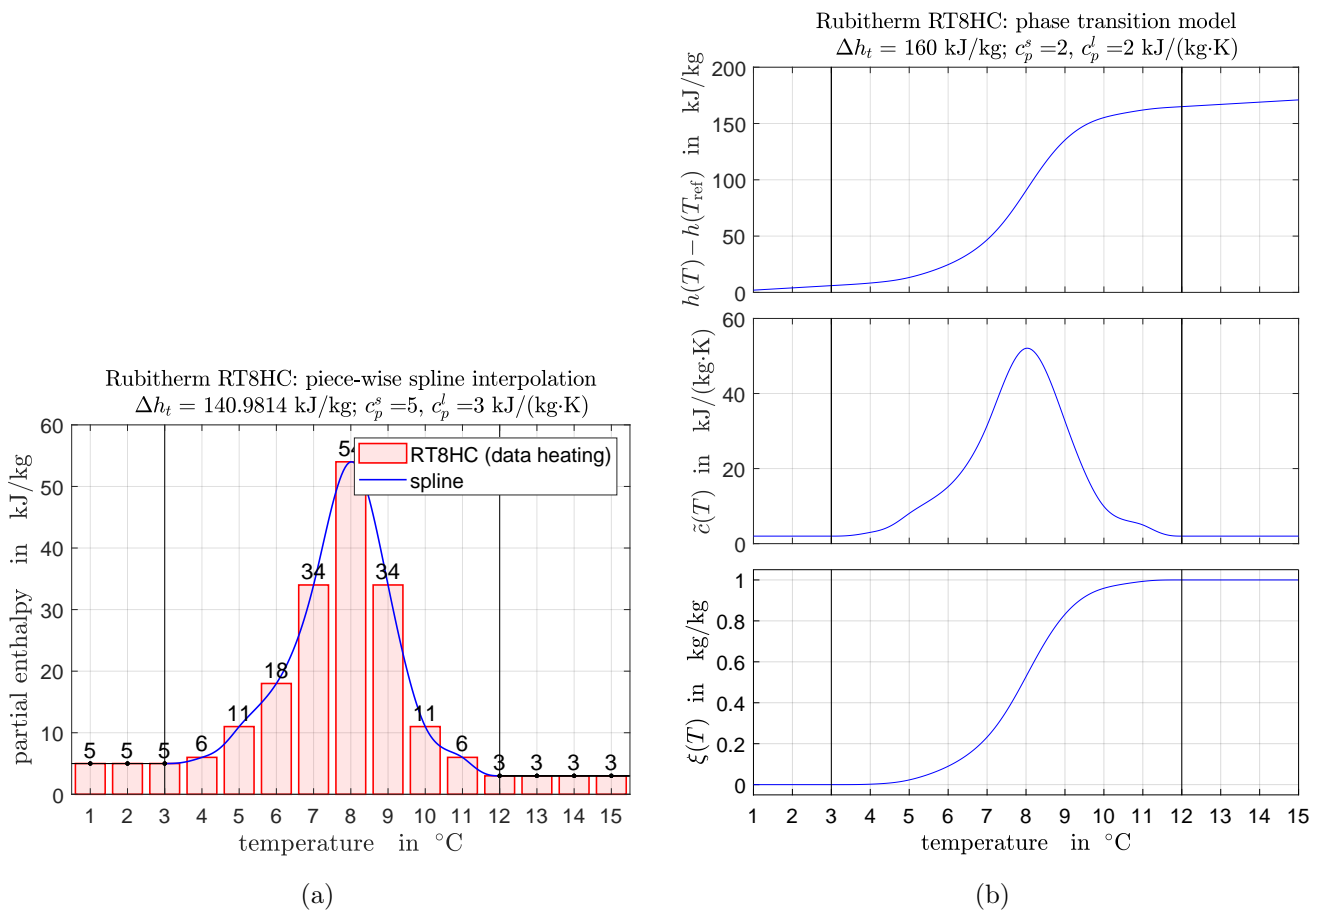

Figure 10: Identified phase transition models for heating for Rubitherm RT8HC.

<sup>1</sup>Barz, T.; Krämer, J.; Emhofer, J. Identification of Phase Fraction–Temperature Curves from Heat Capacity Data for Numerical Modeling of Heat Transfer in Commercial Paraffin Waxes. *Energies* **2020**, *13*, 5149.

## Rubitherm RT9

The heat capacity data is taken from the PCM's datasheet provided by Rubitherm GmbH (Berlin, Germany). The data was generated by 3-layer-calorimetry and is given as stored heat in 1.0 K intervals (first figure). Spline interpolation is used to identify the phase fraction-temperature function  $\xi(T)$ . The phase transition model (second figure) uses the values for  $c_p^l$ ,  $c_p^s$  and  $\Delta h_t$  as given in the date sheet.

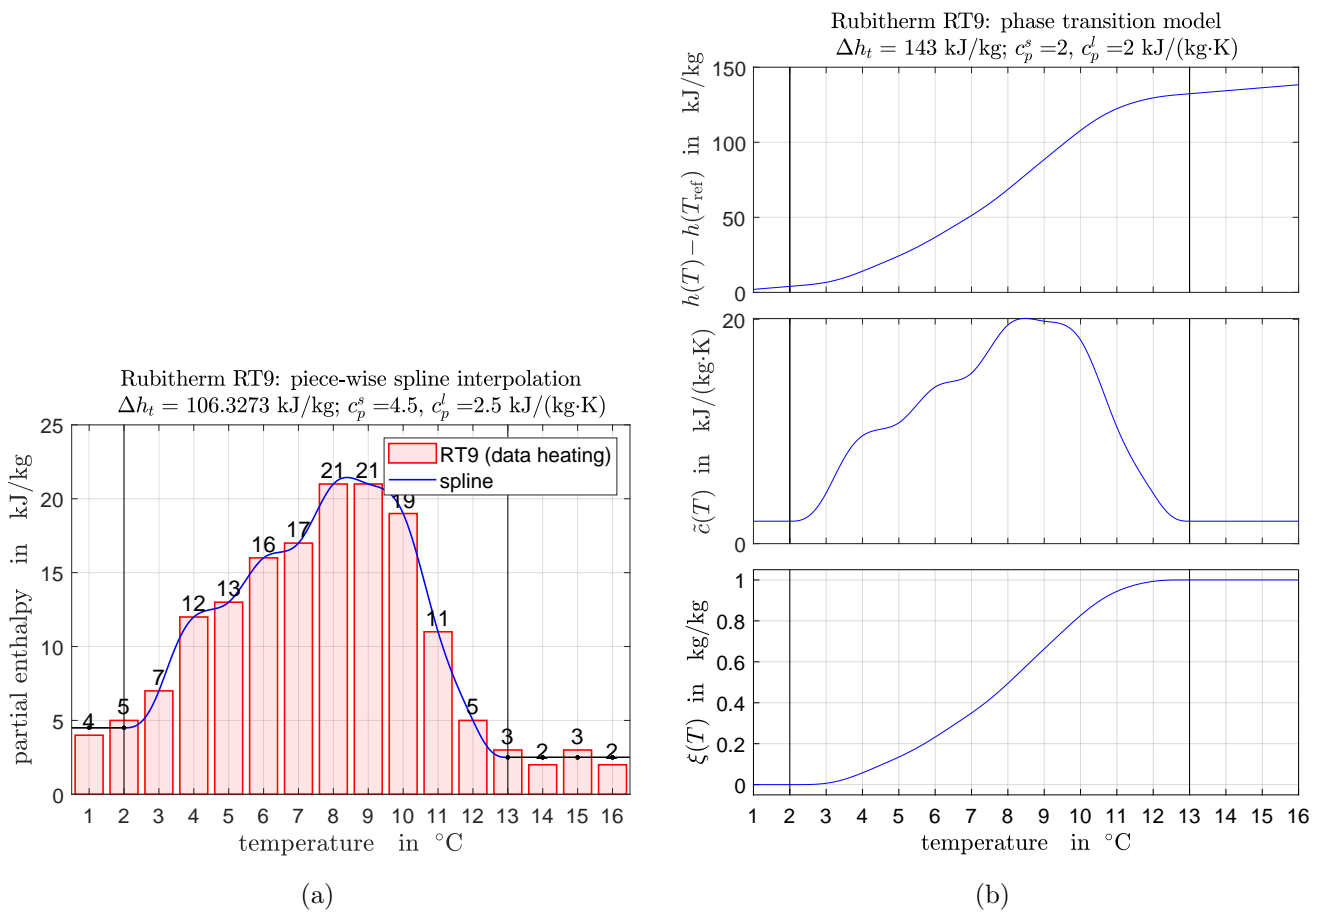

Figure 11: Identified phase transition models for heating for Rubitherm RT9.

<sup>1</sup>Barz, T.; Krämer, J.; Emhofer, J. Identification of Phase Fraction–Temperature Curves from Heat Capacity Data for Numerical Modeling of Heat Transfer in Commercial Paraffin Waxes. *Energies* **2020**, *13*, 5149.

## Rubitherm RT10

The heat capacity data is taken from the PCM's datasheet provided by Rubitherm GmbH (Berlin, Germany). The data was generated by 3-layer-calorimetry and is given as stored heat in 1.0 K intervals (first figure). Spline interpolation is used to identify the phase fraction-temperature function  $\xi(T)$ . The phase transition model (second figure) uses the values for  $c_p^l$ ,  $c_p^s$  and  $\Delta h_t$  as given in the date sheet.

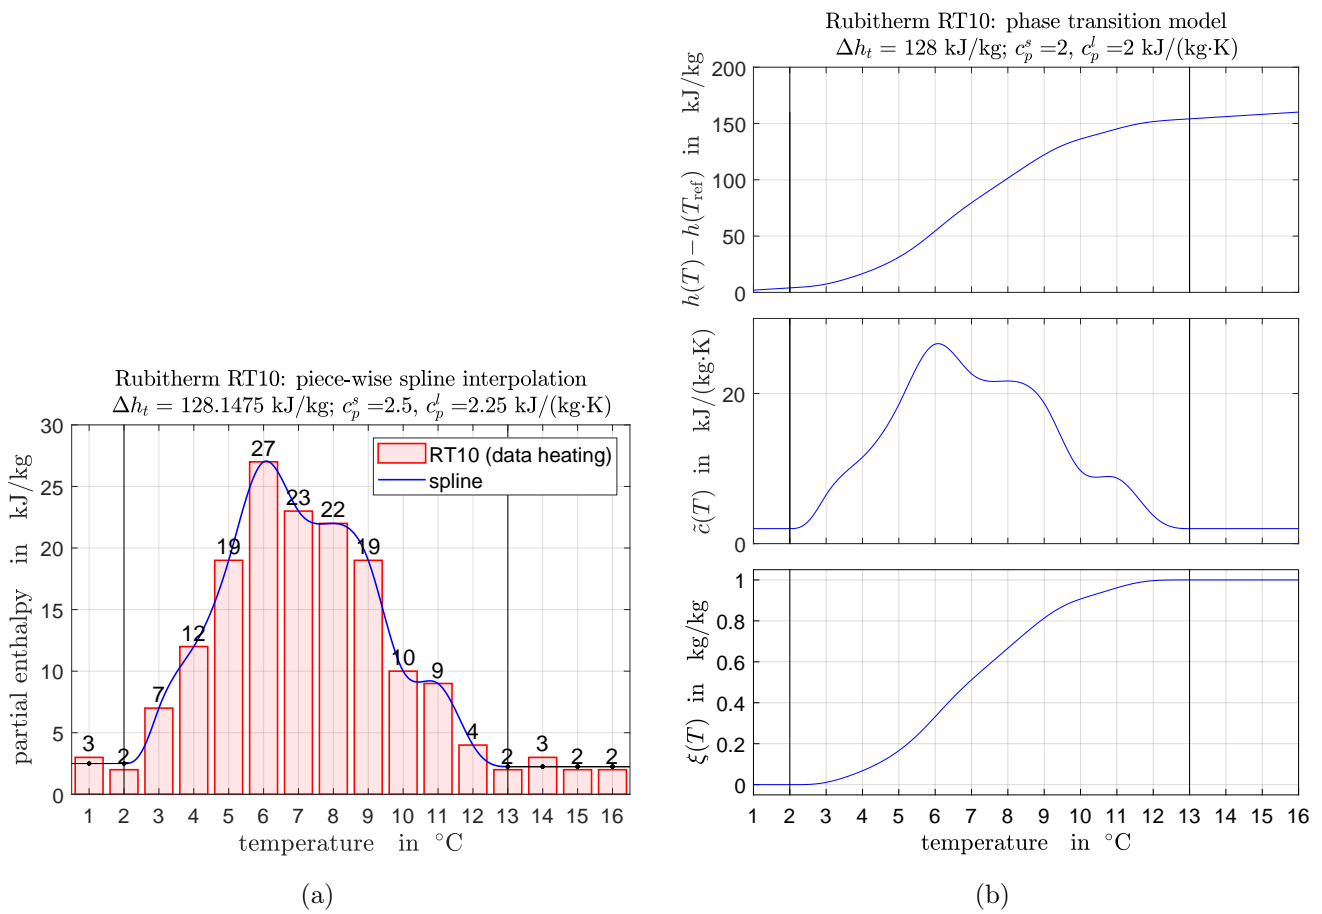

Figure 12: Identified phase transition models for heating for Rubitherm RT10.

<sup>1</sup>Barz, T.; Krämer, J.; Emhofer, J. Identification of Phase Fraction–Temperature Curves from Heat Capacity Data for Numerical Modeling of Heat Transfer in Commercial Paraffin Waxes. *Energies* **2020**, *13*, 5149.

## Rubitherm RT10HC

The heat capacity data is taken from the PCM's datasheet provided by Rubitherm GmbH (Berlin, Germany). The data was generated by 3-layer-calorimetry and is given as stored heat in 1.0 K intervals (first figure). Spline interpolation is used to identify the phase fraction-temperature function  $\xi(T)$ . The phase transition model (second figure) uses the values for  $c_p^l$ ,  $c_p^s$  and  $\Delta h_t$  as given in the date sheet.

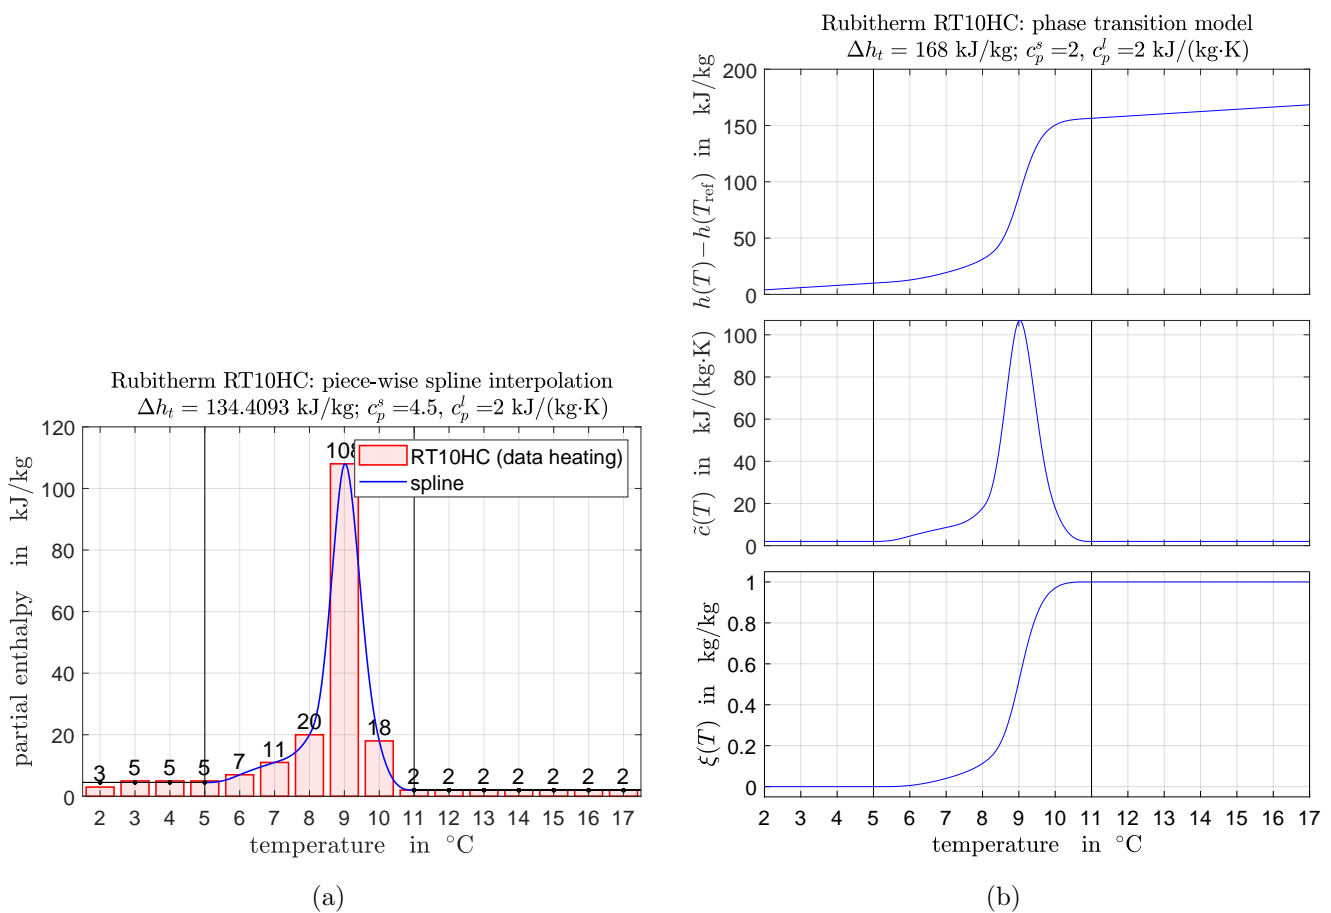

Figure 13: Identified phase transition models for heating for Rubitherm RT10HC.

<sup>1</sup>Barz, T.; Krämer, J.; Emhofer, J. Identification of Phase Fraction–Temperature Curves from Heat Capacity Data for Numerical Modeling of Heat Transfer in Commercial Paraffin Waxes. *Energies* **2020**, *13*, 5149.

## Rubitherm RT11HC

The heat capacity data is taken from the PCM's datasheet provided by Rubitherm GmbH (Berlin, Germany). The data was generated by 3-layer-calorimetry and is given as stored heat in 1.0 K intervals (first figure). Spline interpolation is used to identify the phase fraction-temperature function  $\xi(T)$ . The phase transition model (second figure) uses the values for  $c_p^l$ ,  $c_p^s$  and  $\Delta h_t$  as given in the date sheet.

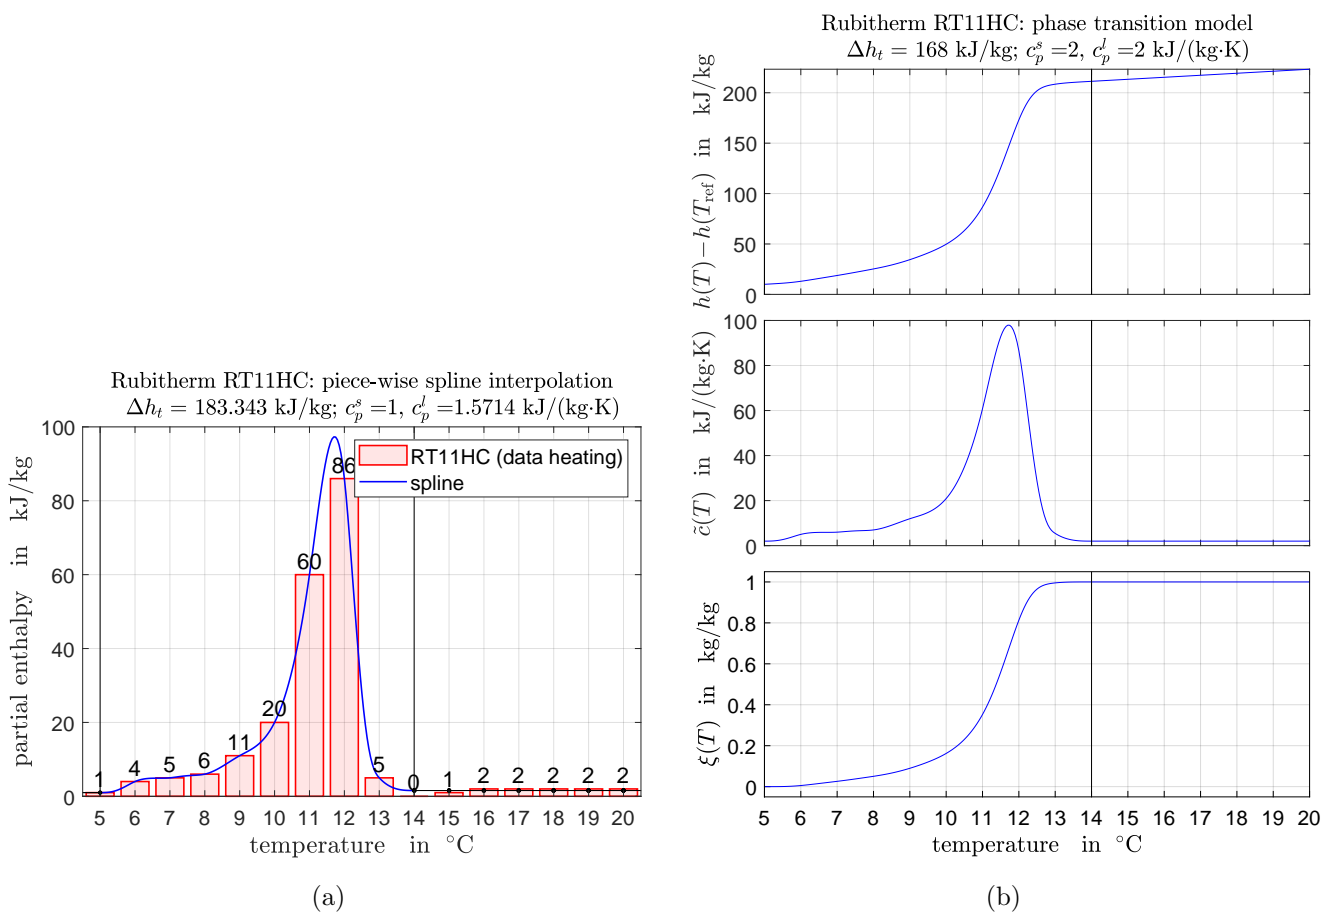

Figure 14: Identified phase transition models for heating for Rubitherm RT11HC.

<sup>1</sup>Barz, T.; Krämer, J.; Emhofer, J. Identification of Phase Fraction–Temperature Curves from Heat Capacity Data for Numerical Modeling of Heat Transfer in Commercial Paraffin Waxes. *Energies* **2020**, *13*, 5149.

## Rubitherm RT12

The heat capacity data is taken from the PCM's datasheet provided by Rubitherm GmbH (Berlin, Germany). The data was generated by 3-layer-calorimetry and is given as stored heat in 1.0 K intervals (first figure). Spline interpolation is used to identify the phase fraction-temperature function  $\xi(T)$ . The phase transition model (second figure) uses the values for  $c_p^l$ ,  $c_p^s$  and  $\Delta h_t$  as given in the date sheet.

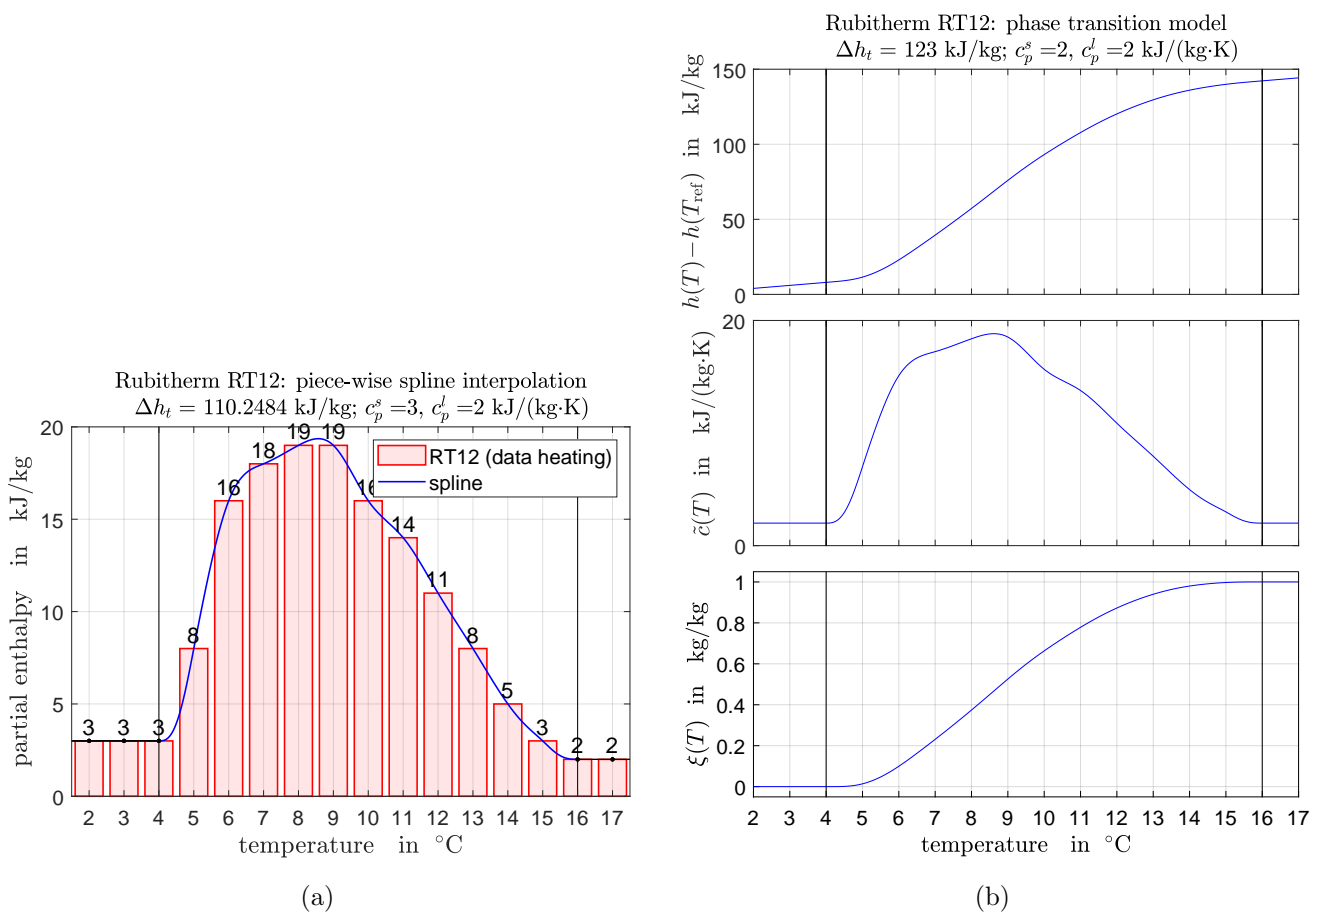

Figure 15: Identified phase transition models for heating for Rubitherm RT12.

<sup>1</sup>Barz, T.; Krämer, J.; Emhofer, J. Identification of Phase Fraction–Temperature Curves from Heat Capacity Data for Numerical Modeling of Heat Transfer in Commercial Paraffin Waxes. *Energies* **2020**, *13*, 5149.

## Rubitherm RT15

The heat capacity data is taken from the PCM's datasheet provided by Rubitherm GmbH (Berlin, Germany). The data was generated by 3-layer-calorimetry and is given as stored heat in 1.0 K intervals (first figure). Spline interpolation is used to identify the phase fraction-temperature function  $\xi(T)$ . The phase transition model (second figure) uses the values for  $c_p^l$ ,  $c_p^s$  and  $\Delta h_t$  as given in the date sheet.

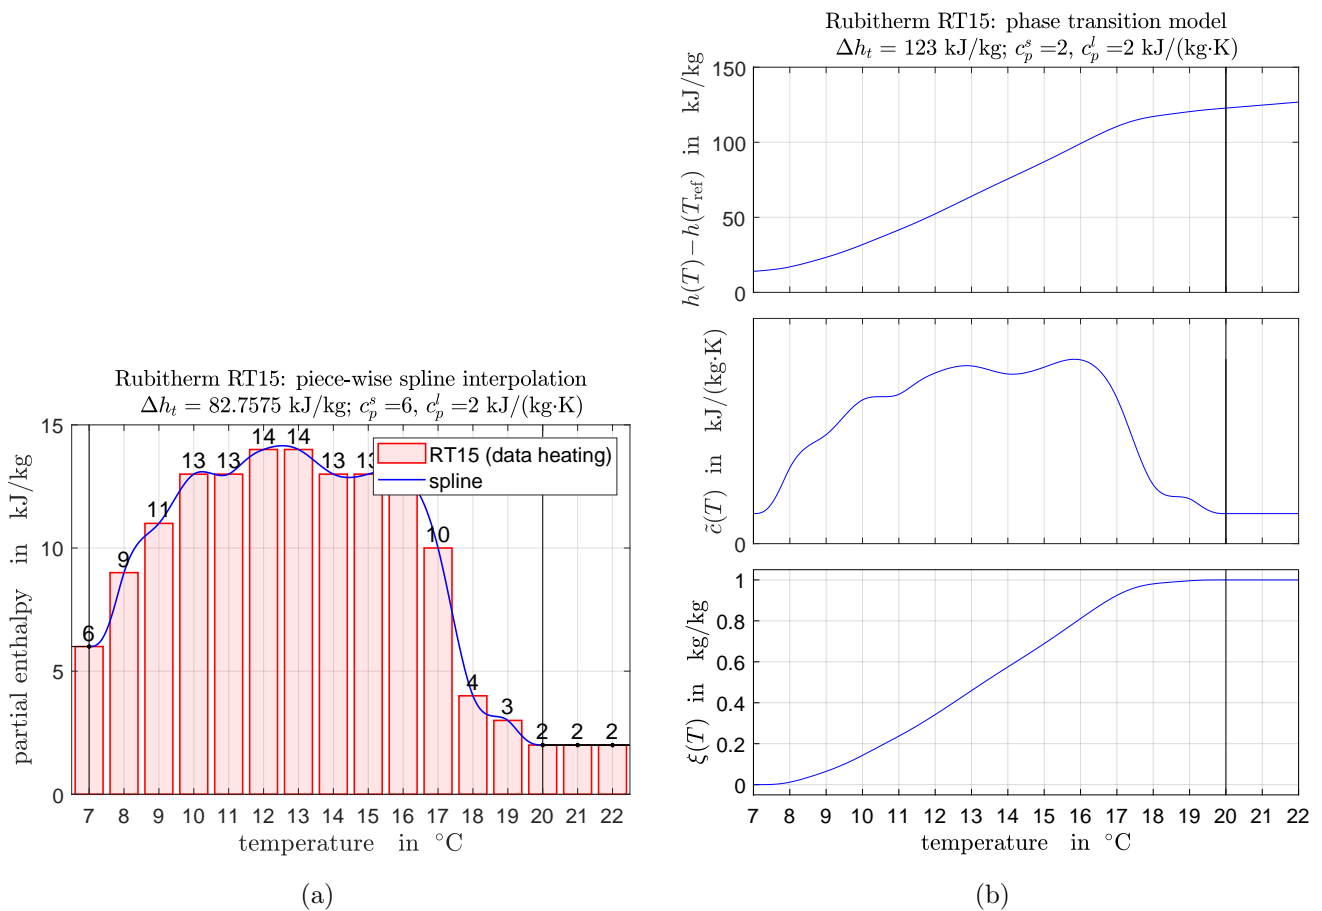

Figure 16: Identified phase transition models for heating for Rubitherm RT15.

<sup>1</sup>Barz, T.; Krämer, J.; Emhofer, J. Identification of Phase Fraction–Temperature Curves from Heat Capacity Data for Numerical Modeling of Heat Transfer in Commercial Paraffin Waxes. *Energies* **2020**, *13*, 5149.



## Rubitherm RT18HC

The heat capacity data is taken from the PCM's datasheet provided by Rubitherm GmbH (Berlin, Germany). The data was generated by 3-layer-calorimetry and is given as stored heat in 1.0 K intervals (first figure). Spline interpolation is used to identify the phase fraction-temperature function  $\xi(T)$ . The phase transition model (second figure) uses the values for  $c_p^l$ ,  $c_p^s$  and  $\Delta h_t$  as given in the date sheet.

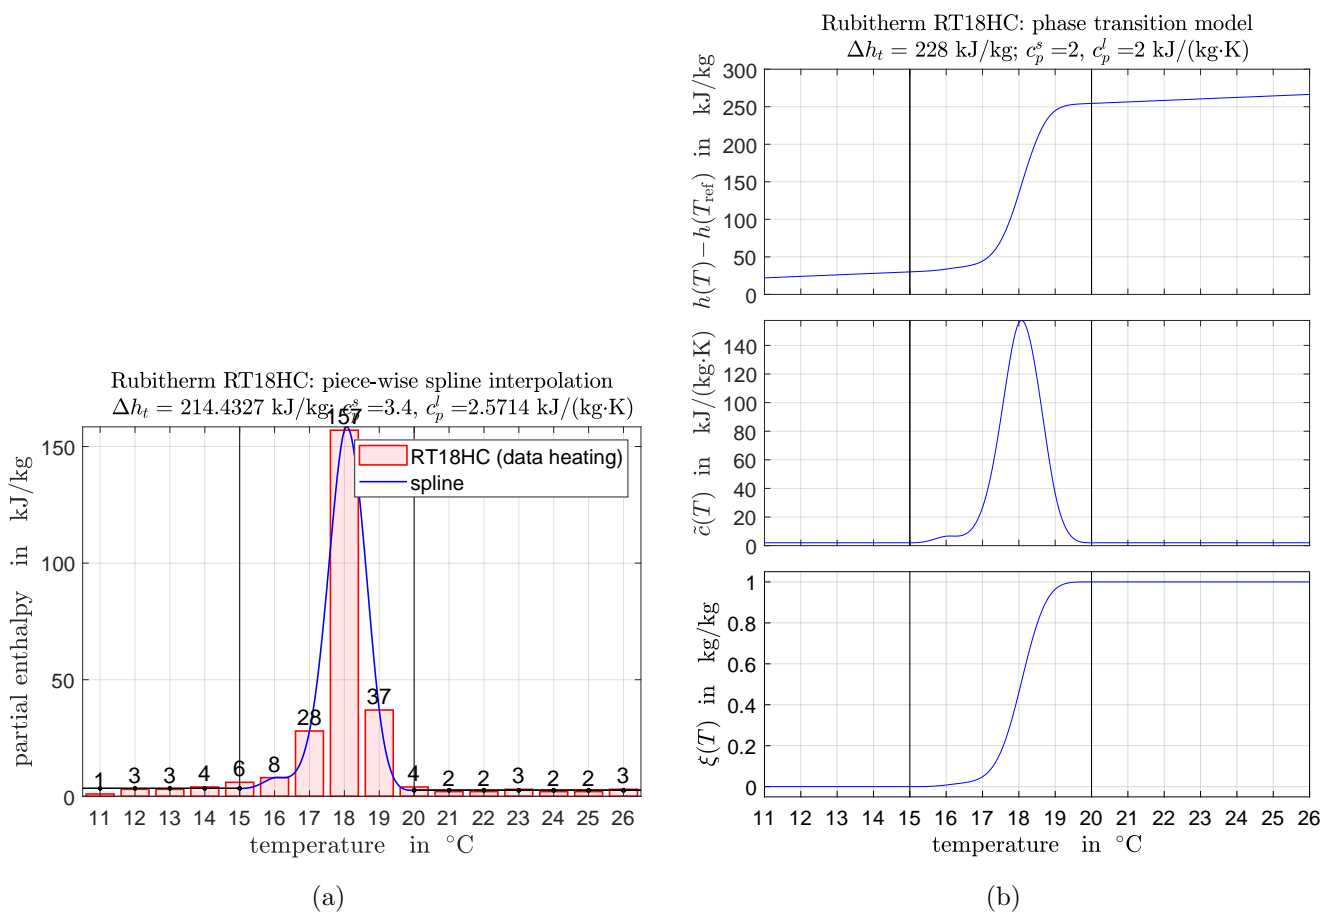

Figure 17: Identified phase transition models for heating for Rubitherm RT18HC.

<sup>1</sup>Barz, T.; Krämer, J.; Emhofer, J. Identification of Phase Fraction–Temperature Curves from Heat Capacity Data for Numerical Modeling of Heat Transfer in Commercial Paraffin Waxes. *Energies* **2020**, *13*, 5149.

## Rubitherm RT21

The heat capacity data is taken from the PCM's datasheet provided by Rubitherm GmbH (Berlin, Germany). The data was generated by 3-layer-calorimetry and is given as stored heat in 1.0 K intervals (first figure). Spline interpolation is used to identify the phase fraction-temperature function  $\xi(T)$ . The phase transition model (second figure) uses the values for  $c_p^l$ ,  $c_p^s$  and  $\Delta h_t$  as given in the date sheet.

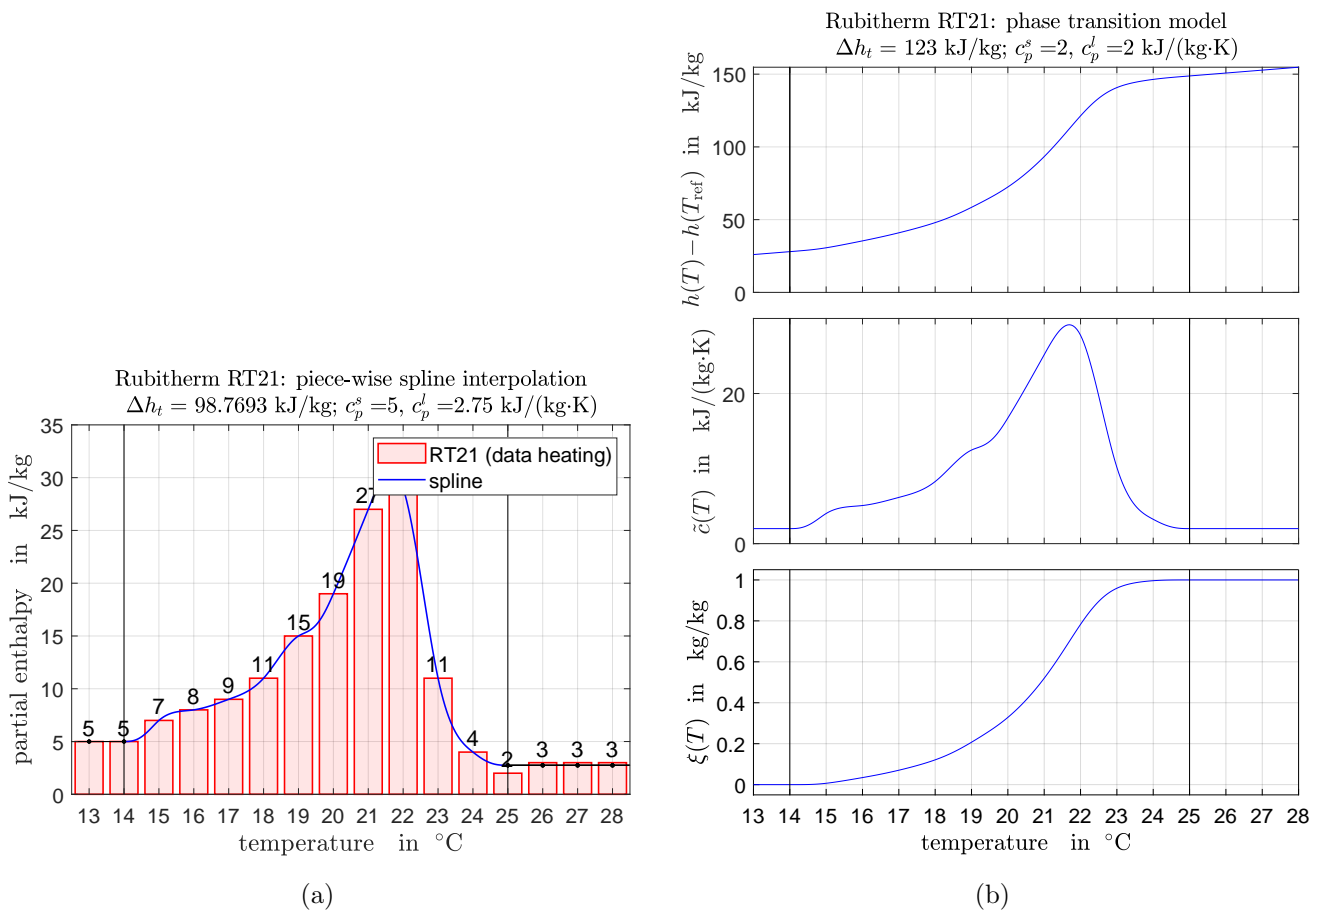

Figure 18: Identified phase transition models for heating for Rubitherm RT21.

<sup>1</sup>Barz, T.; Krämer, J.; Emhofer, J. Identification of Phase Fraction–Temperature Curves from Heat Capacity Data for Numerical Modeling of Heat Transfer in Commercial Paraffin Waxes. *Energies* **2020**, *13*, 5149.

## Rubitherm RT21HC

The heat capacity data is taken from the PCM's datasheet provided by Rubitherm GmbH (Berlin, Germany). The data was generated by 3-layer-calorimetry and is given as stored heat in 1.0 K intervals (first figure). Spline interpolation is used to identify the phase fraction-temperature function  $\xi(T)$ . The phase transition model (second figure) uses the values for  $c_p^l$ ,  $c_p^s$  and  $\Delta h_t$  as given in the date sheet.

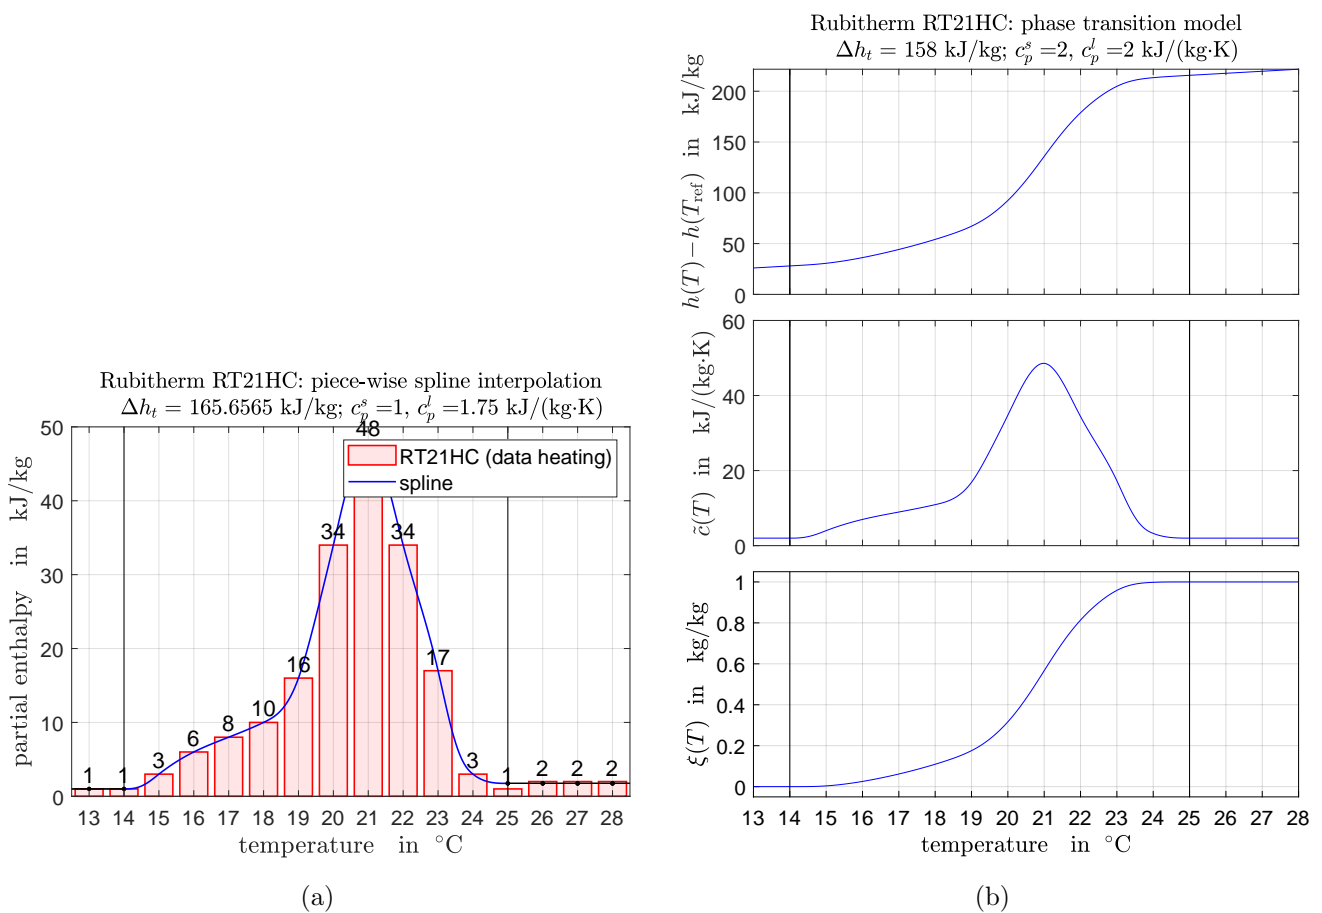

Figure 19: Identified phase transition models for heating for Rubitherm RT21HC.

<sup>1</sup>Barz, T.; Krämer, J.; Emhofer, J. Identification of Phase Fraction–Temperature Curves from Heat Capacity Data for Numerical Modeling of Heat Transfer in Commercial Paraffin Waxes. *Energies* **2020**, *13*, 5149.

## Rubitherm RT22HC

The heat capacity data is taken from the PCM's datasheet provided by Rubitherm GmbH (Berlin, Germany). The data was generated by 3-layer-calorimetry and is given as stored heat in 1.0 K intervals (first figure). Spline interpolation is used to identify the phase fraction-temperature function  $\xi(T)$ . The phase transition model (second figure) uses the values for  $c_p^l$ ,  $c_p^s$  and  $\Delta h_t$  as given in the date sheet.

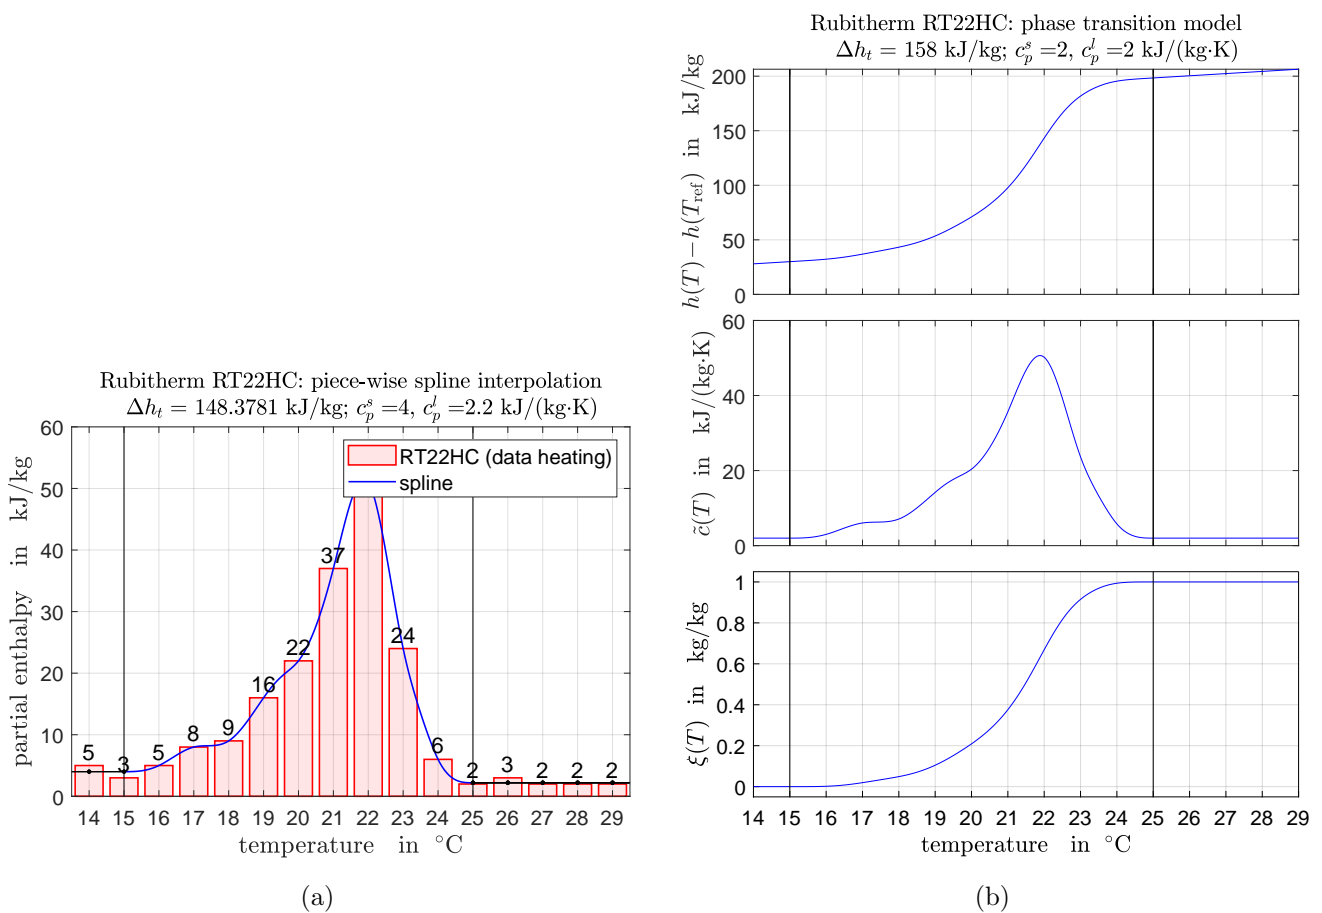

Figure 20: Identified phase transition models for heating for Rubitherm RT22HC.

<sup>1</sup>Barz, T.; Krämer, J.; Emhofer, J. Identification of Phase Fraction–Temperature Curves from Heat Capacity Data for Numerical Modeling of Heat Transfer in Commercial Paraffin Waxes. *Energies* **2020**, *13*, 5149.

## Rubitherm RT24

The heat capacity data is taken from the PCM's datasheet provided by Rubitherm GmbH (Berlin, Germany). The data was generated by 3-layer-calorimetry and is given as stored heat in 1.0 K intervals (first figure). Spline interpolation is used to identify the phase fraction-temperature function  $\xi(T)$ . The phase transition model (second figure) uses the values for  $c_p^l$ ,  $c_p^s$  and  $\Delta h_t$  as given in the date sheet.

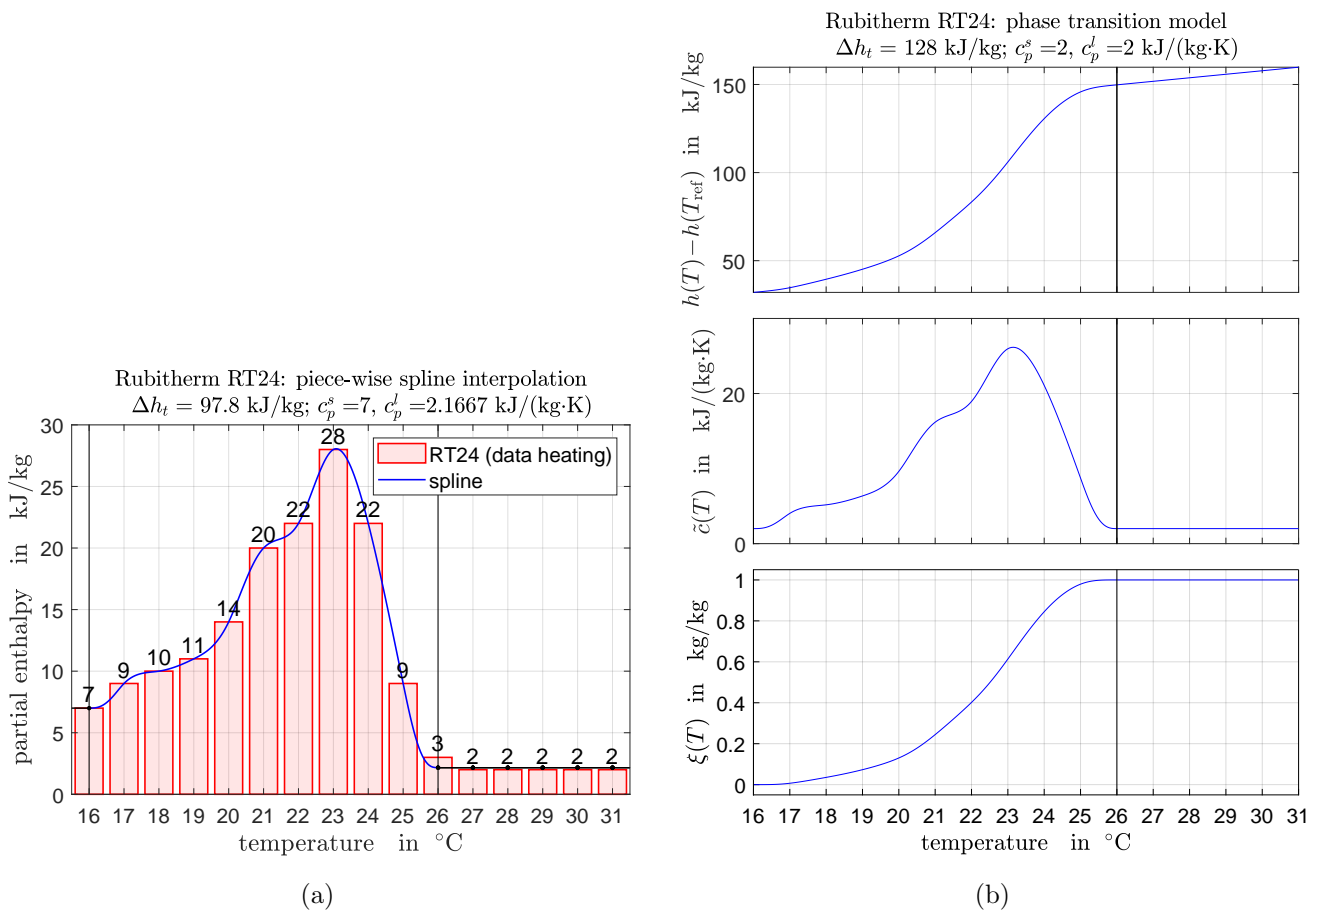

Figure 21: Identified phase transition models for heating for Rubitherm RT24.

<sup>1</sup>Barz, T.; Krämer, J.; Emhofer, J. Identification of Phase Fraction–Temperature Curves from Heat Capacity Data for Numerical Modeling of Heat Transfer in Commercial Paraffin Waxes. *Energies* **2020**, *13*, 5149.

## Rubitherm RT25HC

The heat capacity data is taken from the PCM's datasheet provided by Rubitherm GmbH (Berlin, Germany). The data was generated by 3-layer-calorimetry and is given as stored heat in 1.0 K intervals (first figure). Spline interpolation is used to identify the phase fraction-temperature function  $\xi(T)$ . The phase transition model (second figure) uses the values for  $c_p^l$ ,  $c_p^s$  and  $\Delta h_t$  as given in the date sheet.

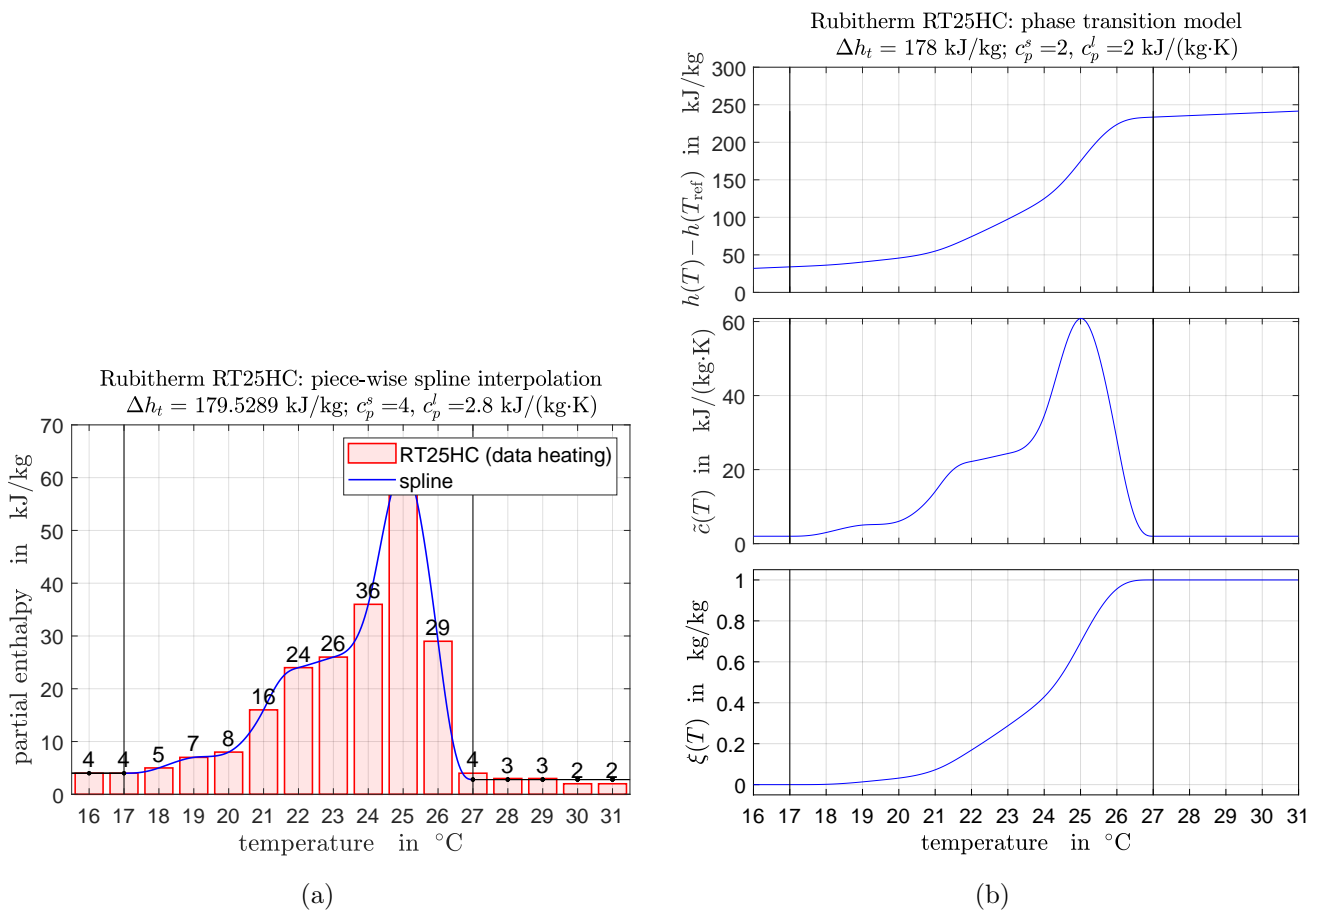

Figure 22: Identified phase transition models for heating for Rubitherm RT25HC.

<sup>1</sup>Barz, T.; Krämer, J.; Emhofer, J. Identification of Phase Fraction–Temperature Curves from Heat Capacity Data for Numerical Modeling of Heat Transfer in Commercial Paraffin Waxes. *Energies* **2020**, *13*, 5149.

## Rubitherm RT26

The heat capacity data is taken from the PCM's datasheet provided by Rubitherm GmbH (Berlin, Germany). The data was generated by 3-layer-calorimetry and is given as stored heat in 1.0 K intervals (first figure). Spline interpolation is used to identify the phase fraction-temperature function  $\xi(T)$ . The phase transition model (second figure) uses the values for  $c_p^l$ ,  $c_p^s$  and  $\Delta h_t$  as given in the date sheet.

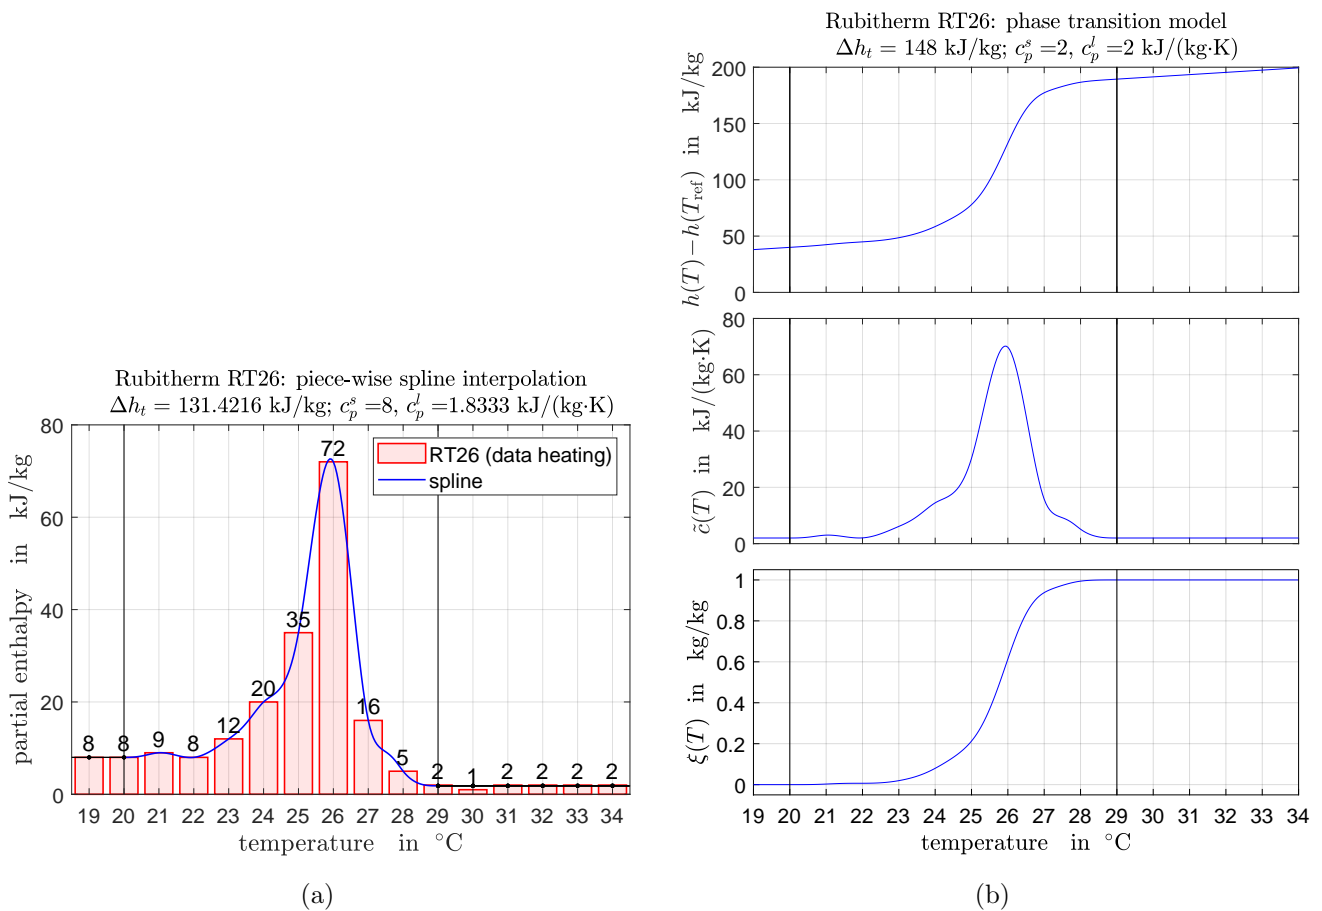

Figure 23: Identified phase transition models for heating for Rubitherm RT26.

<sup>1</sup>Barz, T.; Krämer, J.; Emhofer, J. Identification of Phase Fraction–Temperature Curves from Heat Capacity Data for Numerical Modeling of Heat Transfer in Commercial Paraffin Waxes. *Energies* **2020**, *13*, 5149.

## Rubitherm RT28HC

The heat capacity data is taken from the PCM's datasheet provided by Rubitherm GmbH (Berlin, Germany). The data was generated by 3-layer-calorimetry and is given as stored heat in 1.0 K intervals (first figure). Spline interpolation is used to identify the phase fraction-temperature function  $\xi(T)$ . The phase transition model (second figure) uses the values for  $c_p^l$ ,  $c_p^s$  and  $\Delta h_t$  as given in the date sheet.

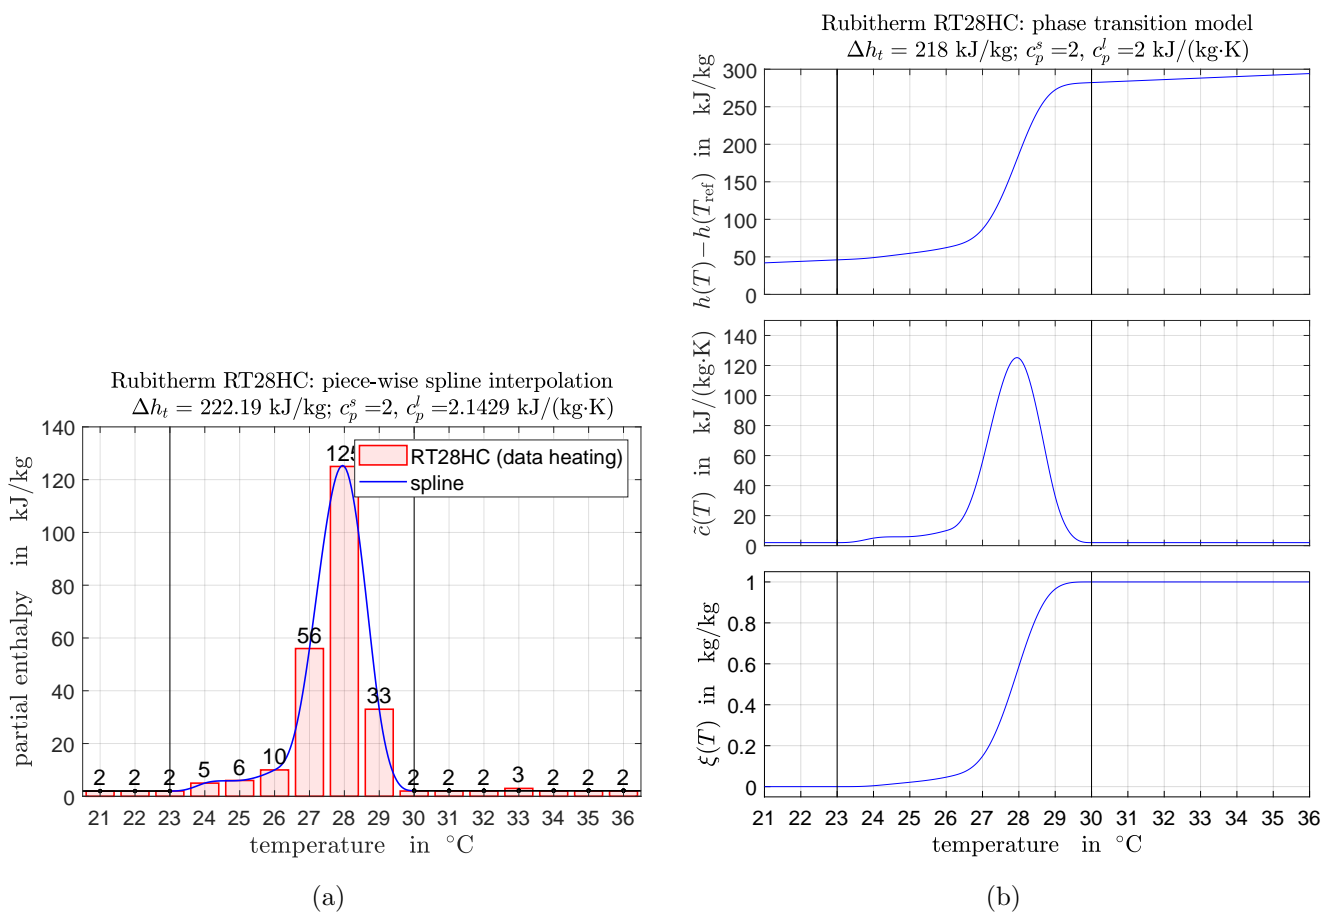

Figure 24: Identified phase transition models for heating for Rubitherm RT28HC.

<sup>1</sup>Barz, T.; Krämer, J.; Emhofer, J. Identification of Phase Fraction–Temperature Curves from Heat Capacity Data for Numerical Modeling of Heat Transfer in Commercial Paraffin Waxes. *Energies* **2020**, *13*, 5149.



## Rubitherm RT31

The heat capacity data is taken from the PCM's datasheet provided by Rubitherm GmbH (Berlin, Germany). The data was generated by 3-layer-calorimetry and is given as stored heat in 1.0 K intervals (first figure). Spline interpolation is used to identify the phase fraction-temperature function  $\xi(T)$ . The phase transition model (second figure) uses the values for  $c_p^l$ ,  $c_p^s$  and  $\Delta h_t$  as given in the date sheet.

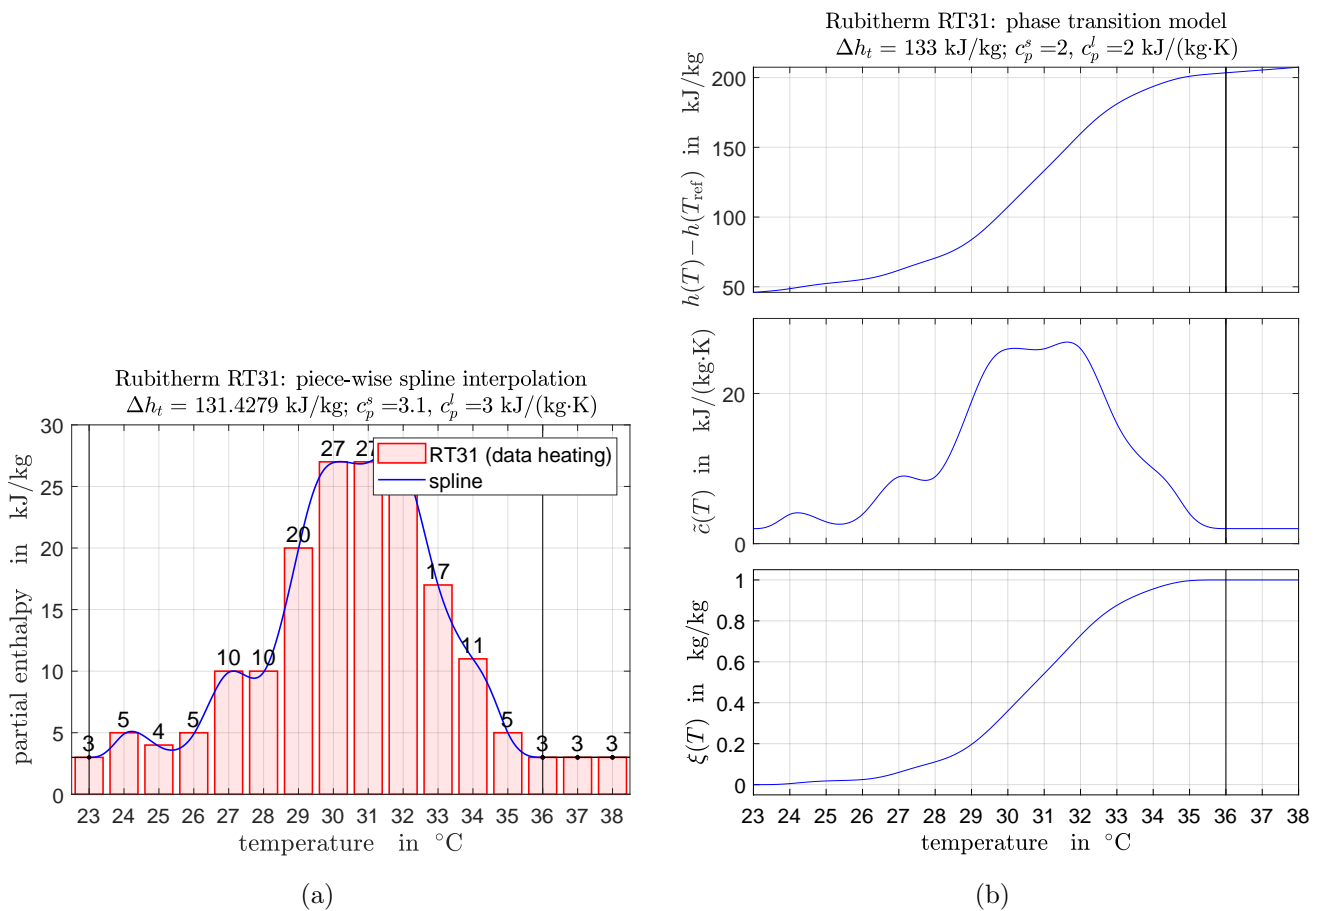

Figure 25: Identified phase transition models for heating for Rubitherm RT31.

<sup>1</sup>Barz, T.; Krämer, J.; Emhofer, J. Identification of Phase Fraction–Temperature Curves from Heat Capacity Data for Numerical Modeling of Heat Transfer in Commercial Paraffin Waxes. *Energies* **2020**, *13*, 5149.

## Rubitherm RT35

The heat capacity data is taken from the PCM's datasheet provided by Rubitherm GmbH (Berlin, Germany). The data was generated by 3-layer-calorimetry and is given as stored heat in 1.0 K intervals (first figure). Spline interpolation is used to identify the phase fraction-temperature function  $\xi(T)$ . The phase transition model (second figure) uses the values for  $c_p^l$ ,  $c_p^s$  and  $\Delta h_t$  as given in the date sheet.

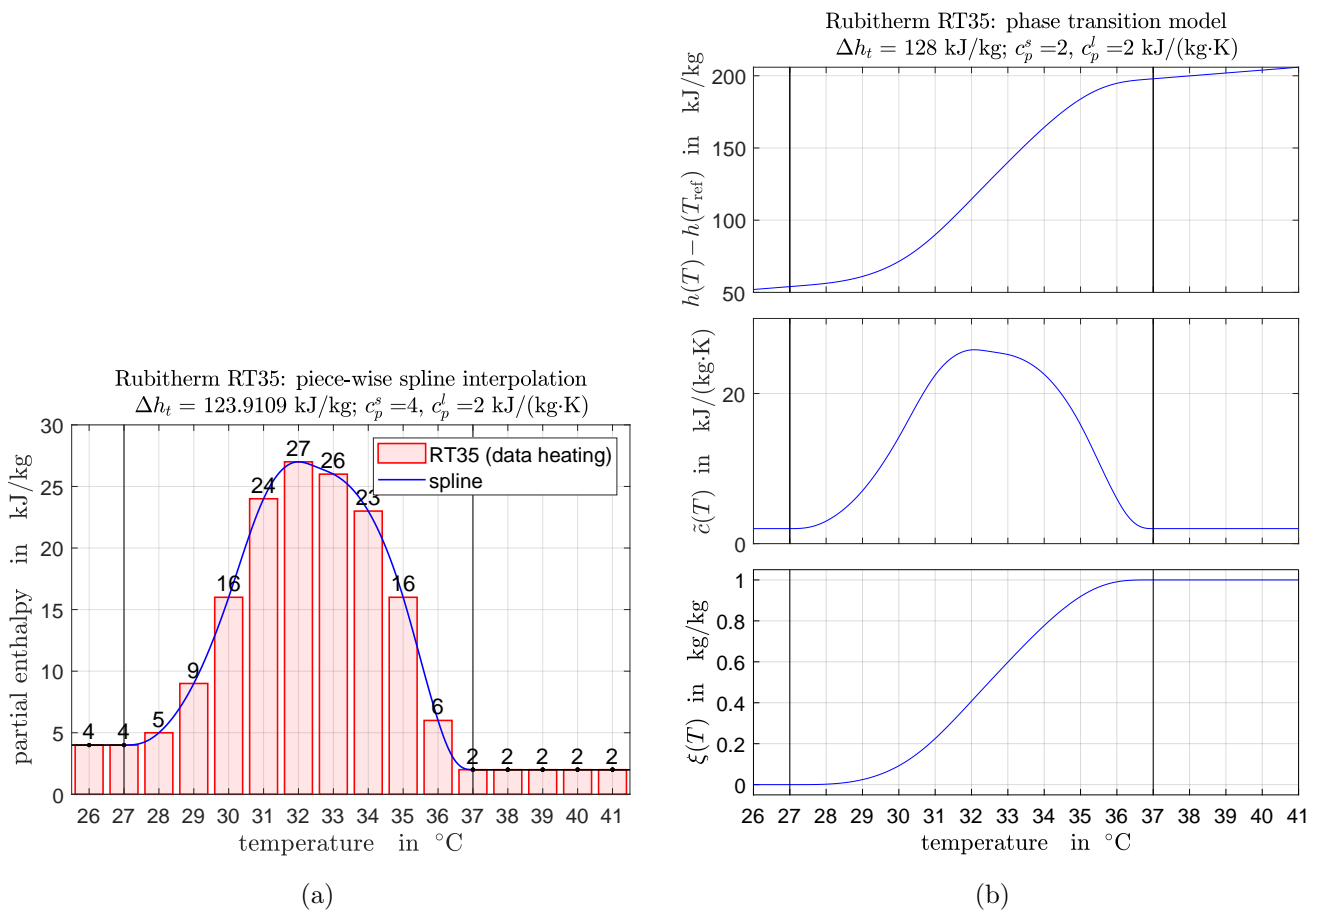

Figure 26: Identified phase transition models for heating for Rubitherm RT35.

<sup>1</sup>Barz, T.; Krämer, J.; Emhofer, J. Identification of Phase Fraction–Temperature Curves from Heat Capacity Data for Numerical Modeling of Heat Transfer in Commercial Paraffin Waxes. *Energies* **2020**, *13*, 5149.

## Rubitherm RT35HC

The heat capacity data is taken from the PCM's datasheet provided by Rubitherm GmbH (Berlin, Germany). The data was generated by 3-layer-calorimetry and is given as stored heat in 1.0 K intervals (first figure). Spline interpolation is used to identify the phase fraction-temperature function  $\xi(T)$ . The phase transition model (second figure) uses the values for  $c_p^l$ ,  $c_p^s$  and  $\Delta h_t$  as given in the date sheet.

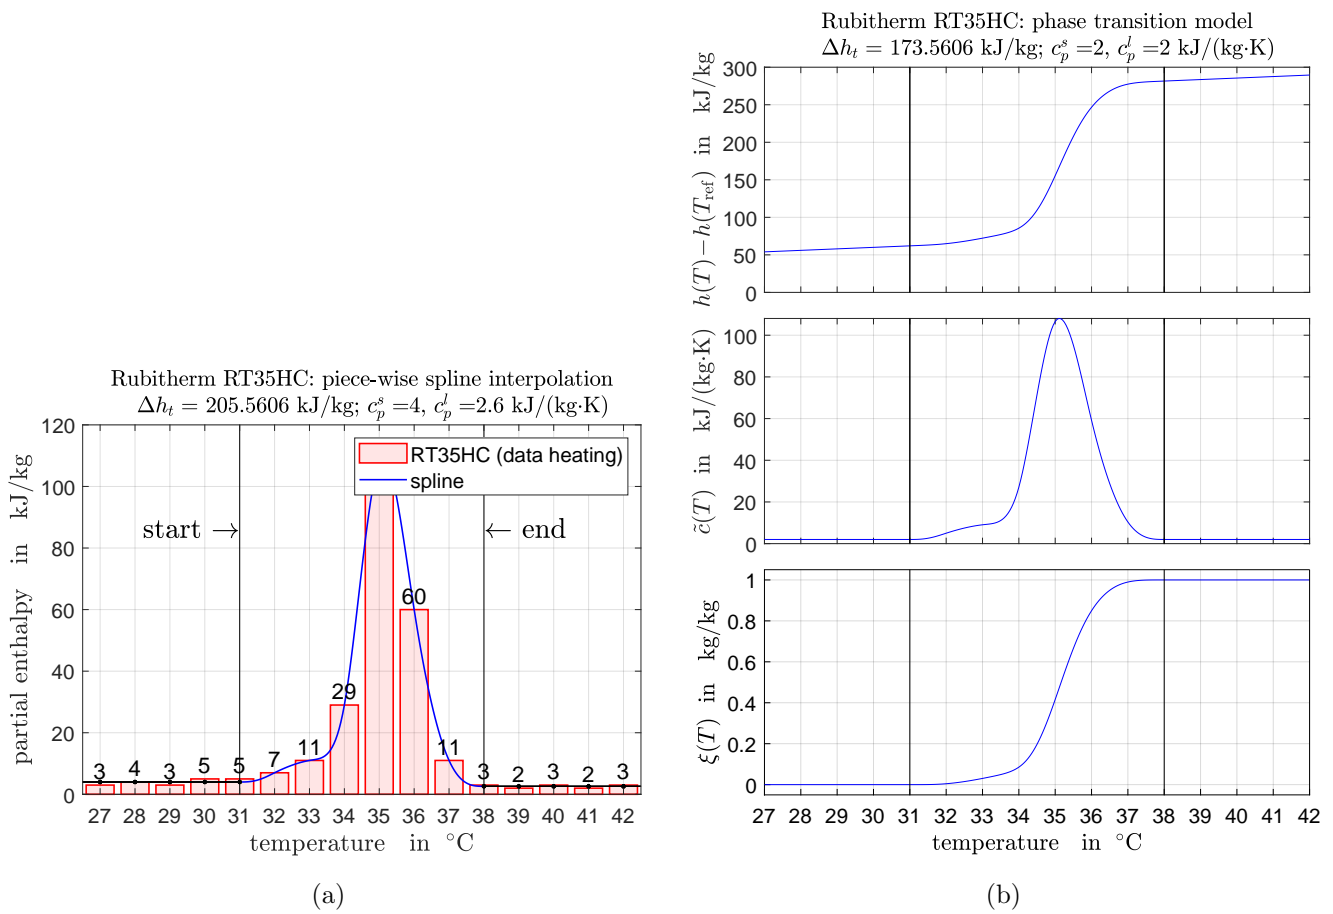

Figure 27: Identified phase transition models for heating for Rubitherm RT35HC.

<sup>1</sup>Barz, T.; Krämer, J.; Emhofer, J. Identification of Phase Fraction–Temperature Curves from Heat Capacity Data for Numerical Modeling of Heat Transfer in Commercial Paraffin Waxes. *Energies* **2020**, *13*, 5149.

## Rubitherm RT42

The heat capacity data is taken from the PCM's datasheet provided by Rubitherm GmbH (Berlin, Germany). The data was generated by 3-layer-calorimetry and is given as stored heat in 1.0 K intervals (first figure). Spline interpolation is used to identify the phase fraction-temperature function  $\xi(T)$ . The phase transition model (second figure) uses the values for  $c_p^l$ ,  $c_p^s$  and  $\Delta h_t$  as given in the date sheet.

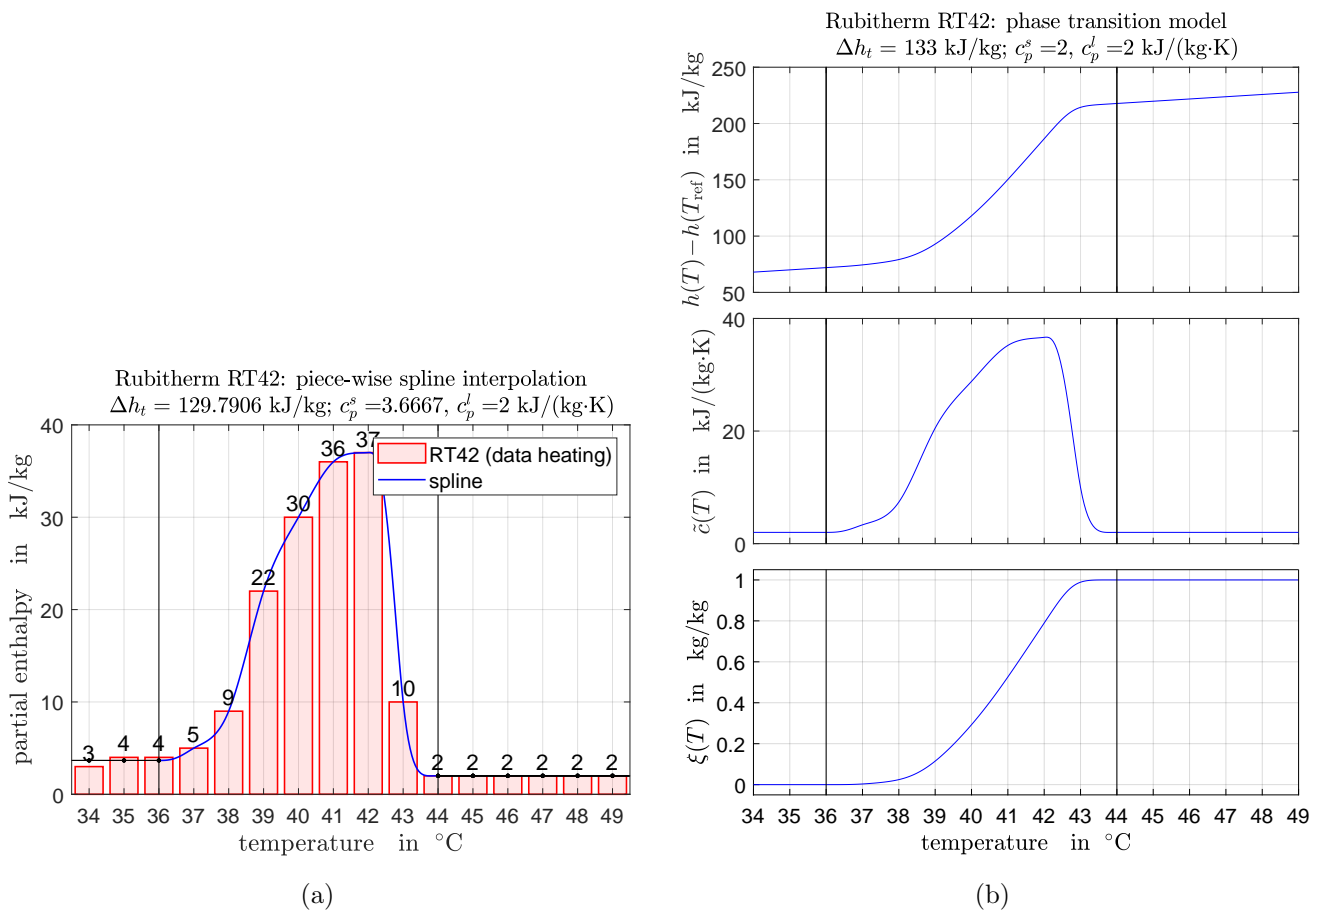

Figure 28: Identified phase transition models for heating for Rubitherm RT42.

<sup>1</sup>Barz, T.; Krämer, J.; Emhofer, J. Identification of Phase Fraction–Temperature Curves from Heat Capacity Data for Numerical Modeling of Heat Transfer in Commercial Paraffin Waxes. *Energies* **2020**, *13*, 5149.

## Rubitherm RT44HC

The heat capacity data is taken from the PCM's datasheet provided by Rubitherm GmbH (Berlin, Germany). The data was generated by 3-layer-calorimetry and is given as stored heat in 1.0 K intervals (first figure). Spline interpolation is used to identify the phase fraction-temperature function  $\xi(T)$ . The phase transition model (second figure) uses the values for  $c_p^l$ ,  $c_p^s$  and  $\Delta h_t$  as given in the date sheet.

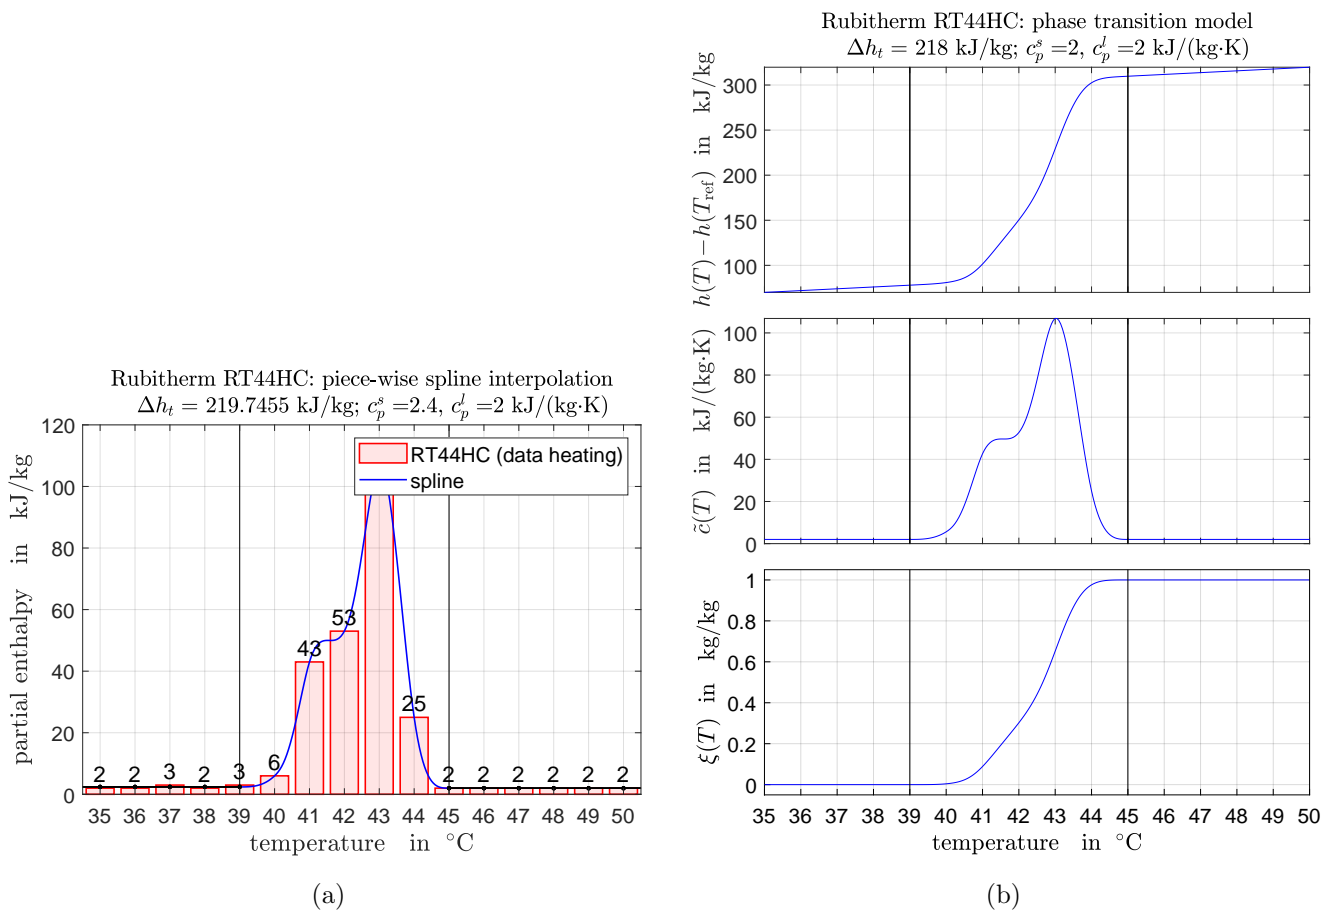

Figure 29: Identified phase transition models for heating for Rubitherm RT44HC.

<sup>1</sup>Barz, T.; Krämer, J.; Emhofer, J. Identification of Phase Fraction–Temperature Curves from Heat Capacity Data for Numerical Modeling of Heat Transfer in Commercial Paraffin Waxes. *Energies* **2020**, *13*, 5149.

## Rubitherm RT47

The heat capacity data is taken from the PCM's datasheet provided by Rubitherm GmbH (Berlin, Germany). The data was generated by 3-layer-calorimetry and is given as stored heat in 1.0 K intervals (first figure). Spline interpolation is used to identify the phase fraction-temperature function  $\xi(T)$ . The phase transition model (second figure) uses the values for  $c_p^l$ ,  $c_p^s$  and  $\Delta h_t$  as given in the date sheet.

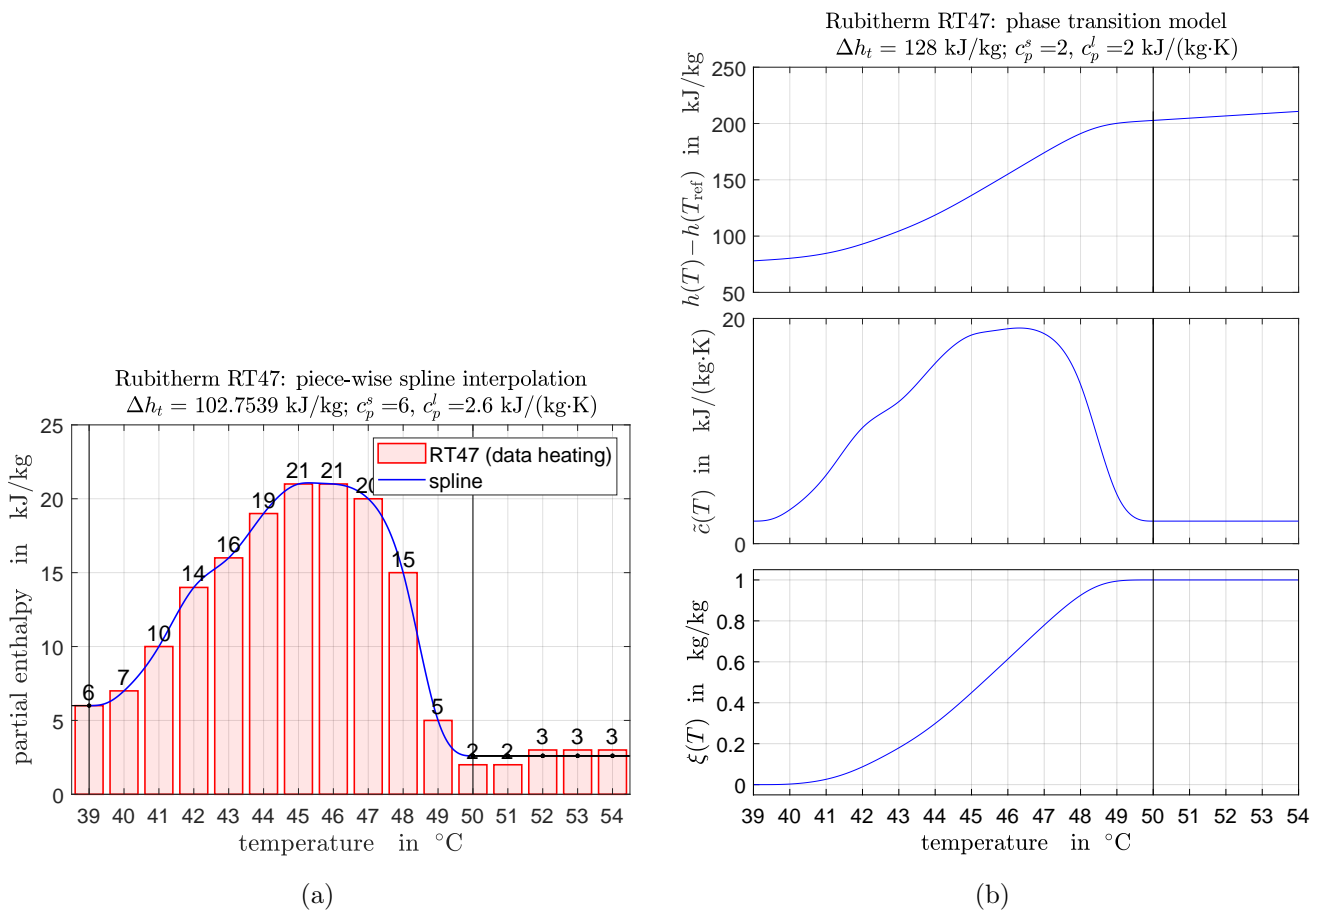

Figure 30: Identified phase transition models for heating for Rubitherm RT47.

<sup>1</sup>Barz, T.; Krämer, J.; Emhofer, J. Identification of Phase Fraction–Temperature Curves from Heat Capacity Data for Numerical Modeling of Heat Transfer in Commercial Paraffin Waxes. *Energies* **2020**, *13*, 5149.

## Rubitherm RT50

The heat capacity data is taken from the PCM's datasheet provided by Rubitherm GmbH (Berlin, Germany). The data was generated by 3-layer-calorimetry and is given as stored heat in 1.0 K intervals (first figure). Spline interpolation is used to identify the phase fraction-temperature function  $\xi(T)$ . The phase transition model (second figure) uses the values for  $c_p^l$ ,  $c_p^s$  and  $\Delta h_t$  as given in the date sheet.

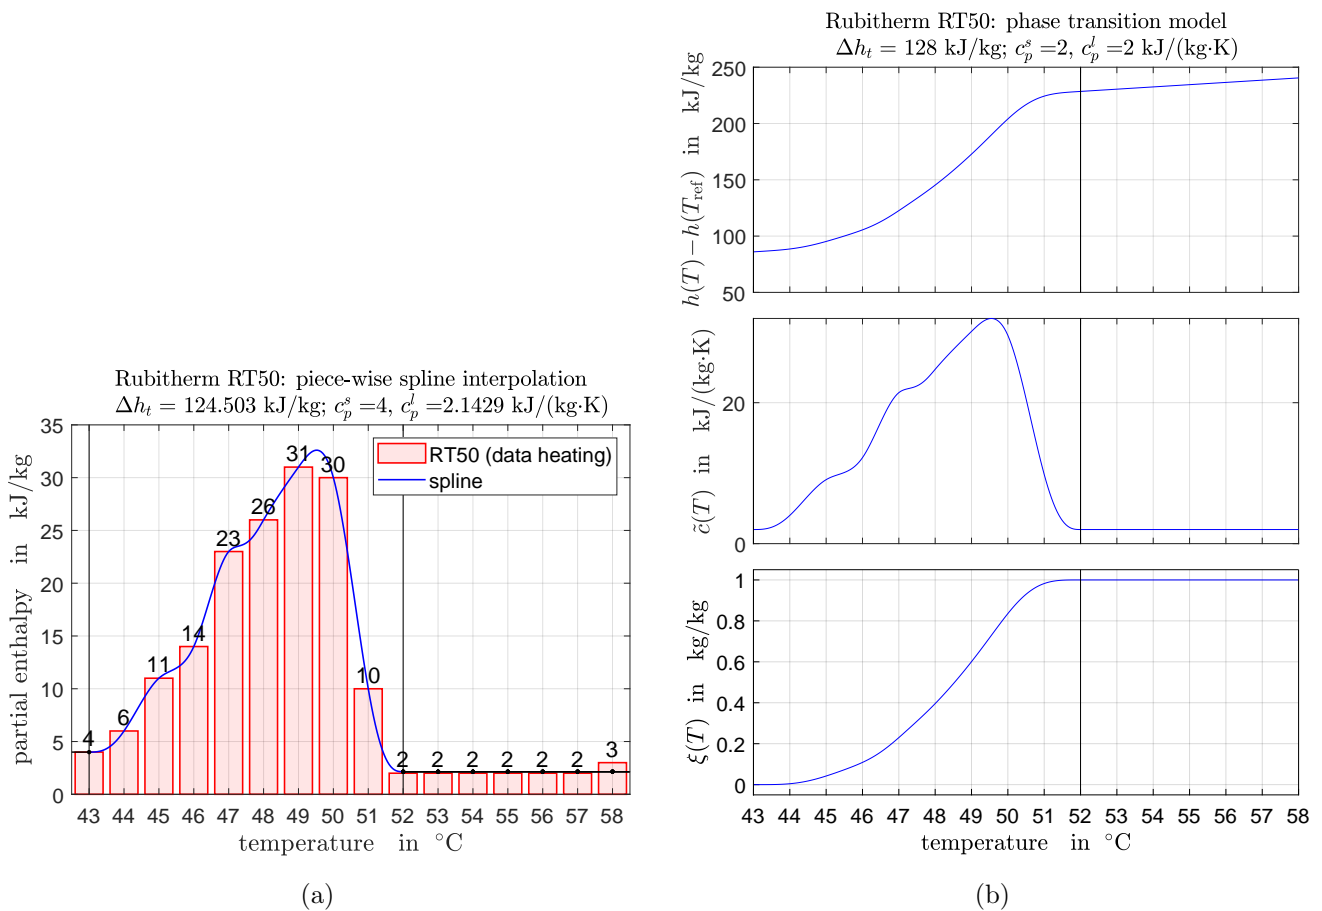

Figure 31: Identified phase transition models for heating for Rubitherm RT50.

<sup>1</sup>Barz, T.; Krämer, J.; Emhofer, J. Identification of Phase Fraction–Temperature Curves from Heat Capacity Data for Numerical Modeling of Heat Transfer in Commercial Paraffin Waxes. *Energies* **2020**, *13*, 5149.

## Rubitherm RT54HC

The heat capacity data is taken from the PCM's datasheet provided by Rubitherm GmbH (Berlin, Germany). The data was generated by 3-layer-calorimetry and is given as stored heat in 1.0 K intervals (first figure). Spline interpolation is used to identify the phase fraction-temperature function  $\xi(T)$ . The phase transition model (second figure) uses the values for  $c_p^l$ ,  $c_p^s$  and  $\Delta h_t$  as given in the date sheet.

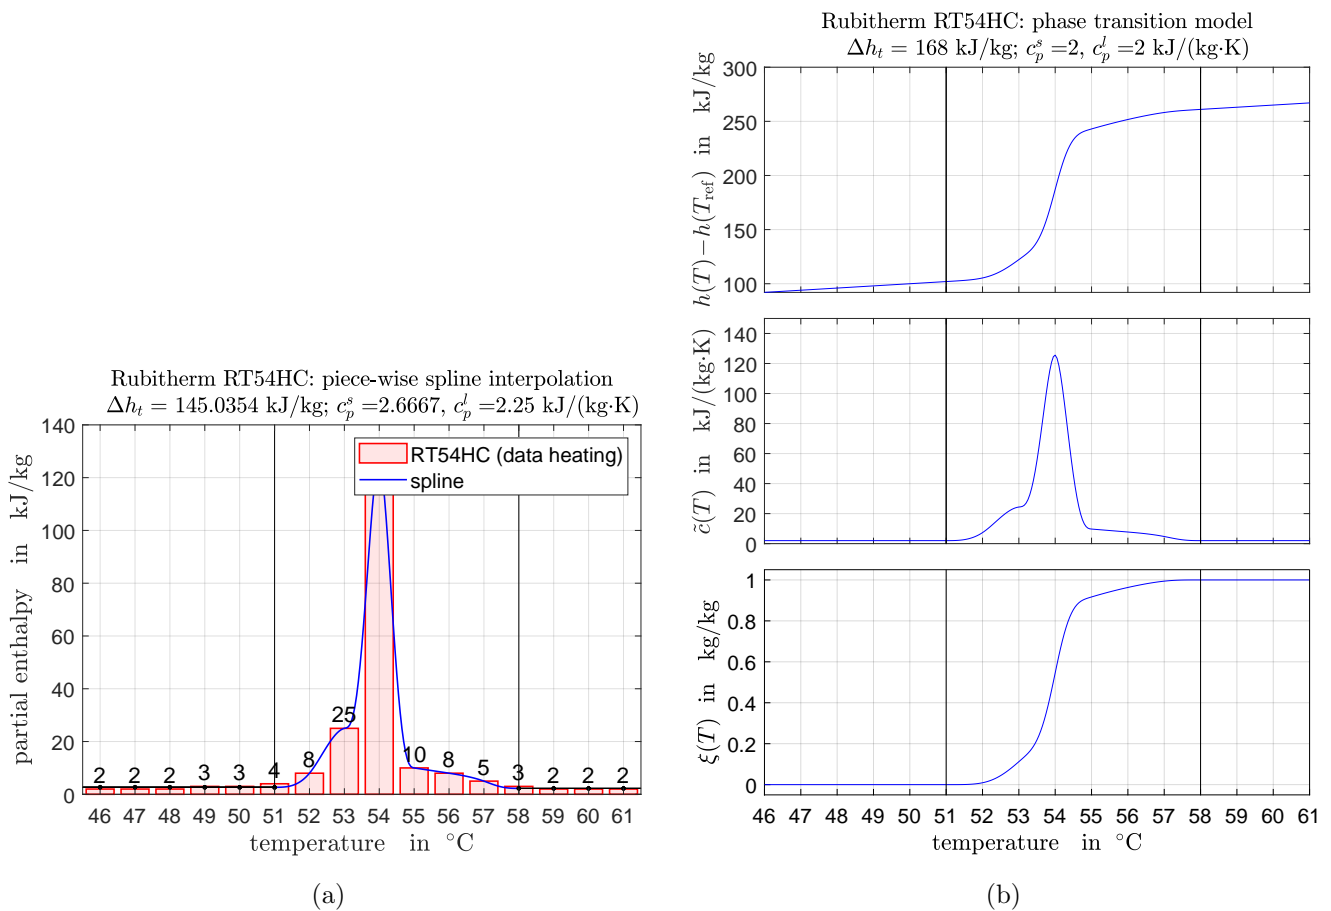

Figure 32: Identified phase transition models for heating for Rubitherm RT54HC.

<sup>1</sup>Barz, T.; Krämer, J.; Emhofer, J. Identification of Phase Fraction–Temperature Curves from Heat Capacity Data for Numerical Modeling of Heat Transfer in Commercial Paraffin Waxes. *Energies* **2020**, *13*, 5149.



## Rubitherm RT55

The heat capacity data is taken from the PCM's datasheet provided by Rubitherm GmbH (Berlin, Germany). The data was generated by 3-layer-calorimetry and is given as stored heat in 1.0 K intervals (first figure). Spline interpolation is used to identify the phase fraction-temperature function  $\xi(T)$ . The phase transition model (second figure) uses the values for  $c_p^l$ ,  $c_p^s$  and  $\Delta h_t$  as given in the date sheet.

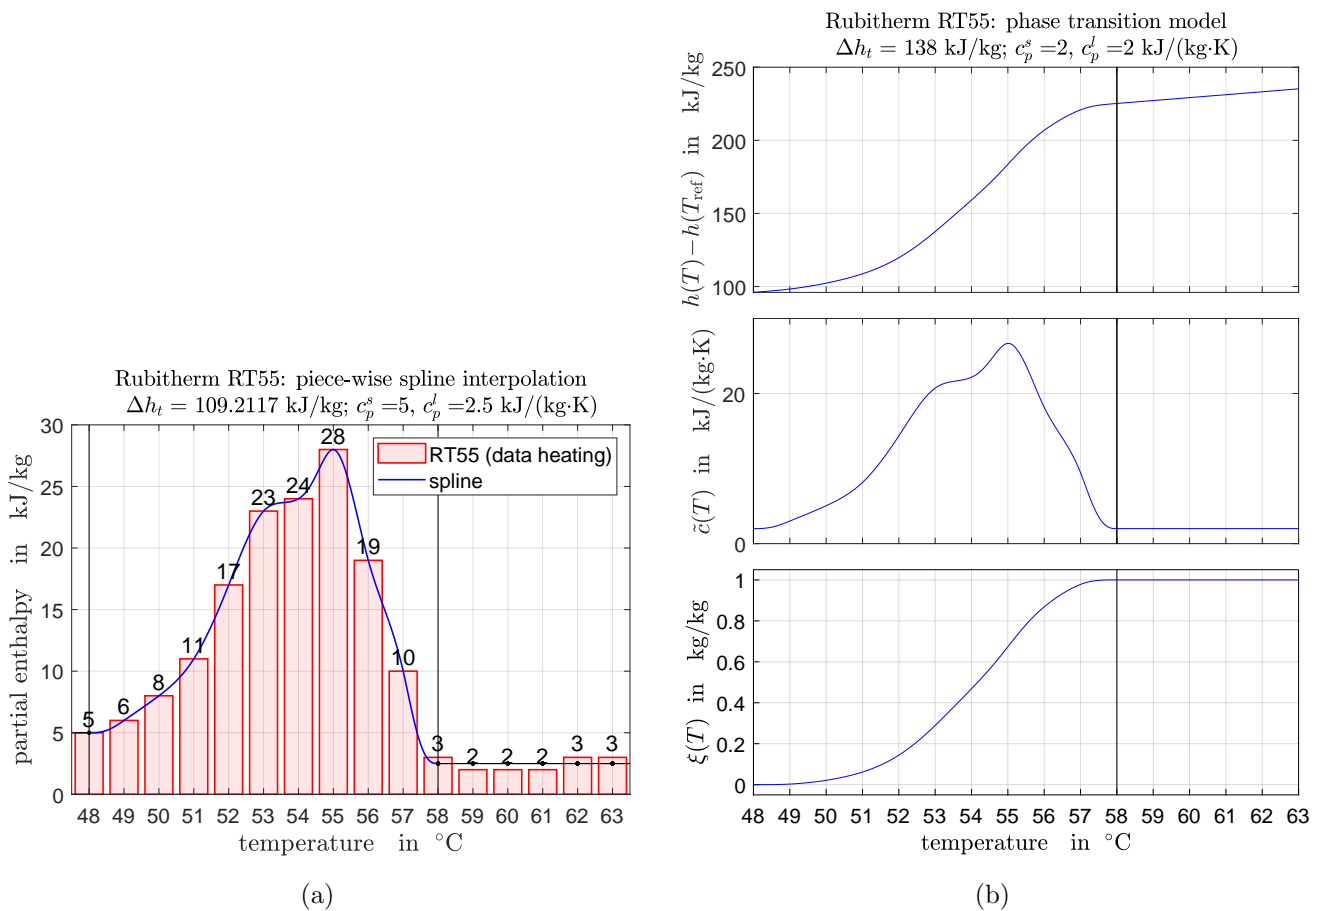

Figure 33: Identified phase transition models for heating for Rubitherm RT55.

<sup>1</sup>Barz, T.; Krämer, J.; Emhofer, J. Identification of Phase Fraction–Temperature Curves from Heat Capacity Data for Numerical Modeling of Heat Transfer in Commercial Paraffin Waxes. *Energies* **2020**, *13*, 5149.

## Rubitherm RT60

The heat capacity data is taken from the PCM's datasheet provided by Rubitherm GmbH (Berlin, Germany). The data was generated by 3-layer-calorimetry and is given as stored heat in 1.0 K intervals (first figure). Spline interpolation is used to identify the phase fraction-temperature function  $\xi(T)$ . The phase transition model (second figure) uses the values for  $c_p^l$ ,  $c_p^s$  and  $\Delta h_t$  as given in the date sheet.

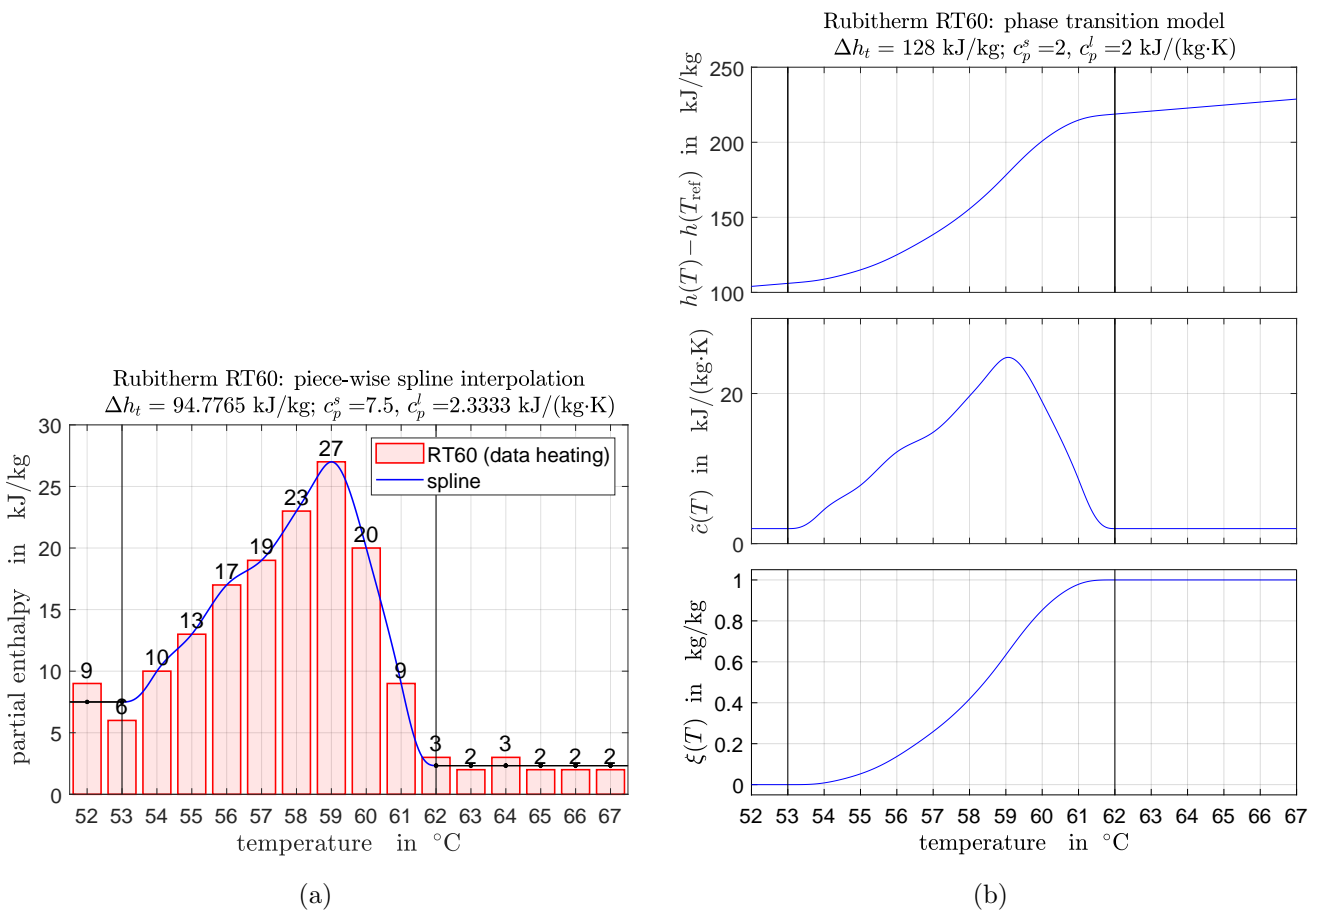

Figure 34: Identified phase transition models for heating for Rubitherm RT60.

<sup>1</sup>Barz, T.; Krämer, J.; Emhofer, J. Identification of Phase Fraction–Temperature Curves from Heat Capacity Data for Numerical Modeling of Heat Transfer in Commercial Paraffin Waxes. *Energies* **2020**, *13*, 5149.

## Rubitherm RT62HC

The heat capacity data is taken from the PCM's datasheet provided by Rubitherm GmbH (Berlin, Germany). The data was generated by 3-layer-calorimetry and is given as stored heat in 1.0 K intervals (first figure). Spline interpolation is used to identify the phase fraction-temperature function  $\xi(T)$ . The phase transition model (second figure) uses the values for  $c_p^l$ ,  $c_p^s$  and  $\Delta h_t$  as given in the date sheet.

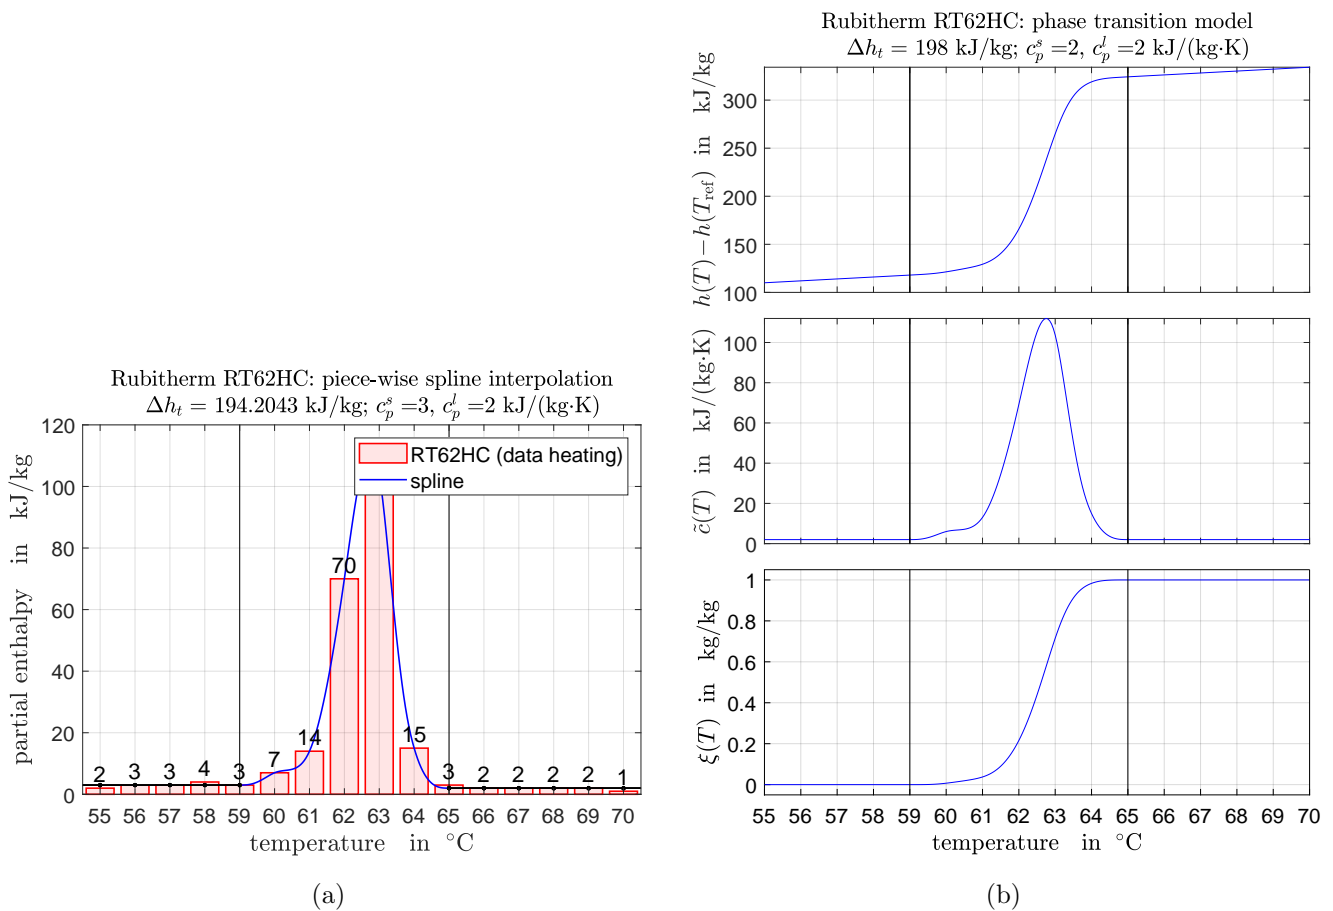

Figure 35: Identified phase transition models for heating for Rubitherm RT62HC.

<sup>1</sup>Barz, T.; Krämer, J.; Emhofer, J. Identification of Phase Fraction–Temperature Curves from Heat Capacity Data for Numerical Modeling of Heat Transfer in Commercial Paraffin Waxes. *Energies* **2020**, *13*, 5149.

## Rubitherm RT64HC

The heat capacity data is taken from the PCM's datasheet provided by Rubitherm GmbH (Berlin, Germany). The data was generated by 3-layer-calorimetry and is given as stored heat in 1.0 K intervals (first figure). Spline interpolation is used to identify the phase fraction-temperature function  $\xi(T)$ . The phase transition model (second figure) uses the values for  $c_p^l$ ,  $c_p^s$  and  $\Delta h_t$  as given in the date sheet.

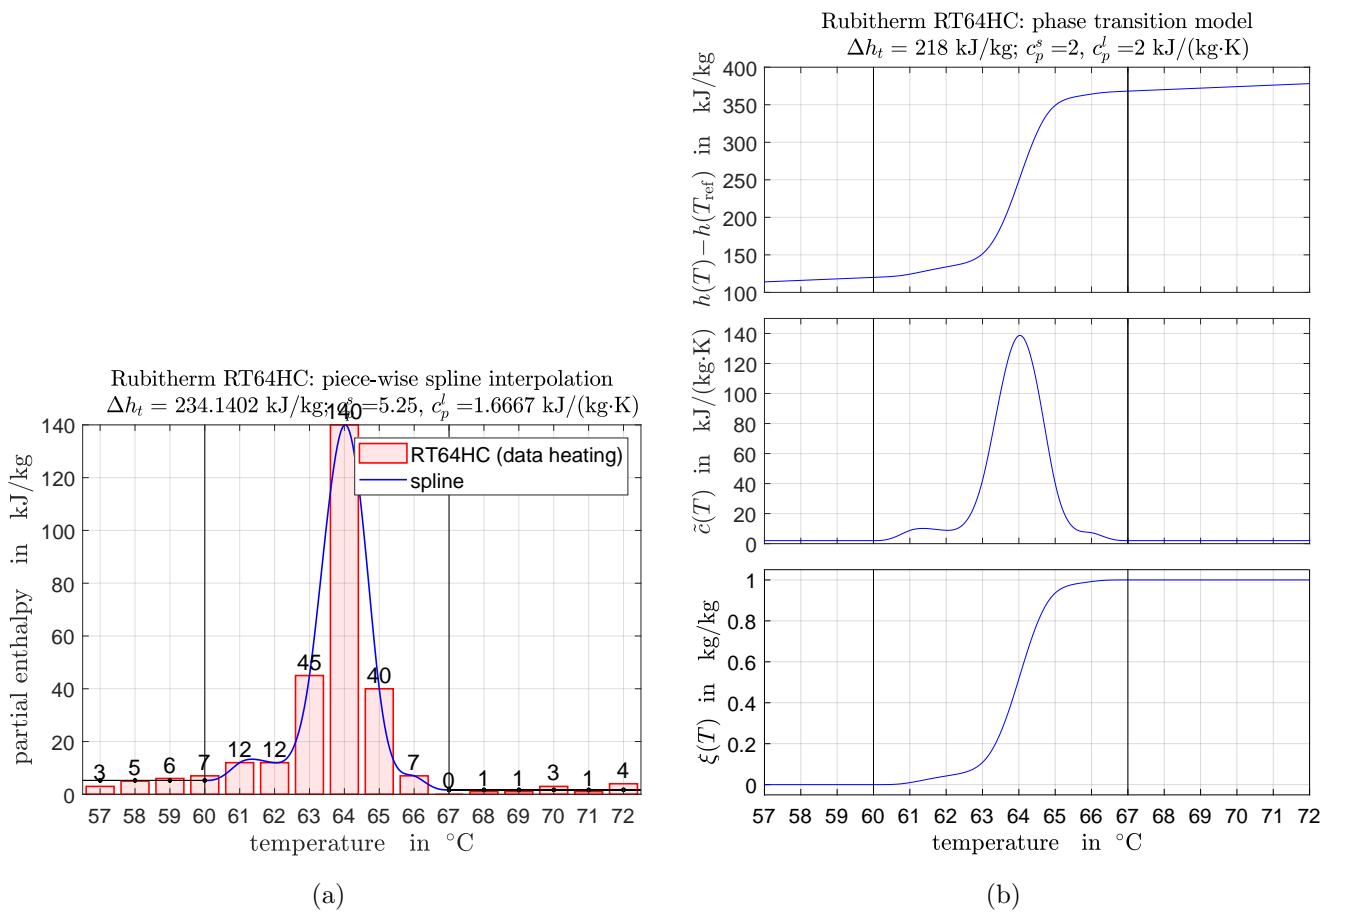

Figure 36: Identified phase transition models for heating for Rubitherm RT64HC.

<sup>1</sup>Barz, T.; Krämer, J.; Emhofer, J. Identification of Phase Fraction–Temperature Curves from Heat Capacity Data for Numerical Modeling of Heat Transfer in Commercial Paraffin Waxes. *Energies* **2020**, *13*, 5149.

## Rubitherm RT65

The heat capacity data is taken from the PCM's datasheet provided by Rubitherm GmbH (Berlin, Germany). The data was generated by 3-layer-calorimetry and is given as stored heat in 1.0 K intervals (first figure). Spline interpolation is used to identify the phase fraction-temperature function  $\xi(T)$ . The phase transition model (second figure) uses the values for  $c_p^l$ ,  $c_p^s$  and  $\Delta h_t$  as given in the date sheet.

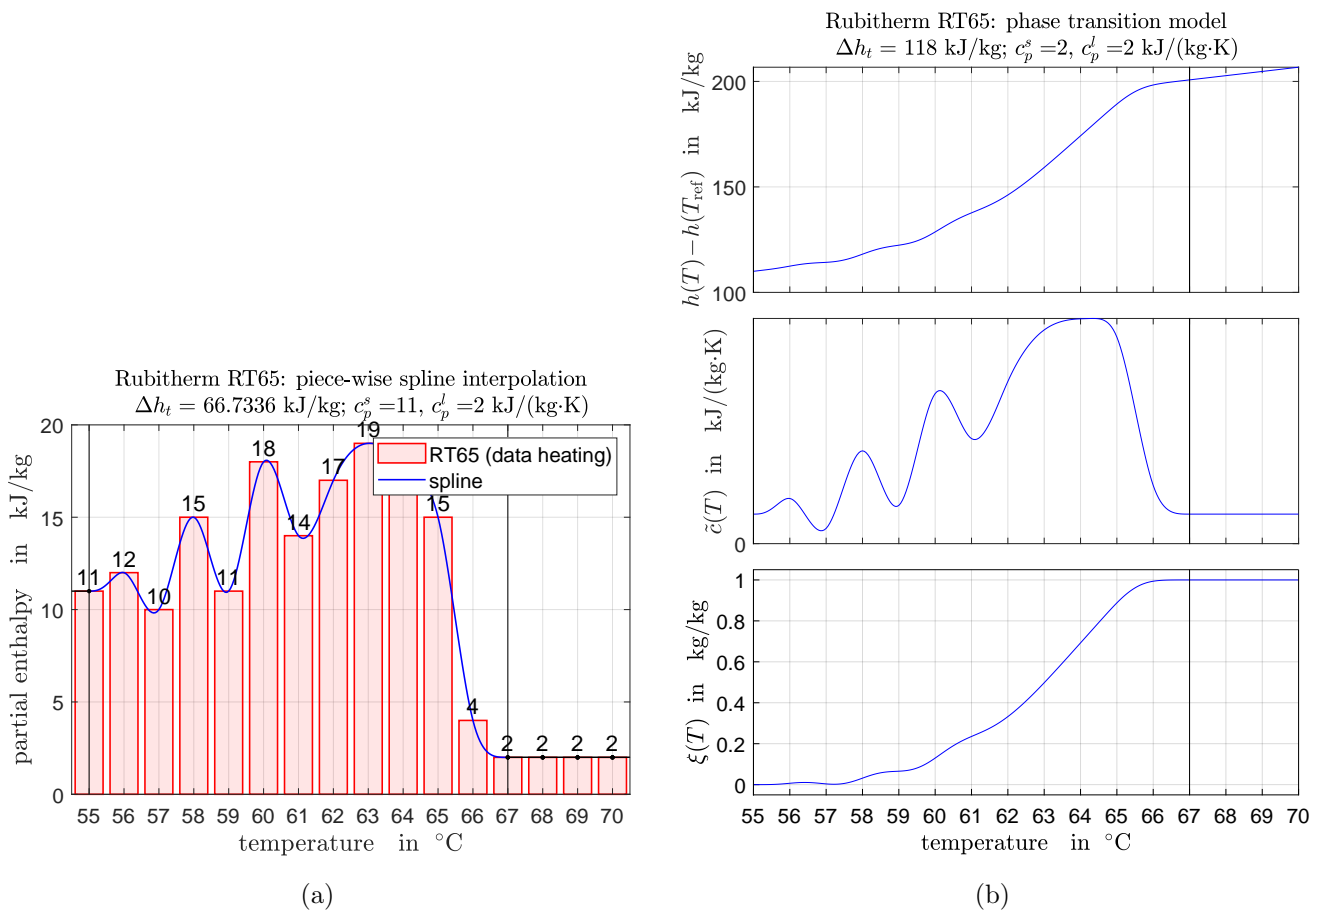

Figure 37: Identified phase transition models for heating for Rubitherm RT65.

<sup>1</sup>Barz, T.; Krämer, J.; Emhofer, J. Identification of Phase Fraction–Temperature Curves from Heat Capacity Data for Numerical Modeling of Heat Transfer in Commercial Paraffin Waxes. *Energies* **2020**, *13*, 5149.

## Rubitherm RT69HC

The heat capacity data is taken from the PCM's datasheet provided by Rubitherm GmbH (Berlin, Germany). The data was generated by 3-layer-calorimetry and is given as stored heat in 1.0 K intervals (first figure). Spline interpolation is used to identify the phase fraction-temperature function  $\xi(T)$ . The phase transition model (second figure) uses the values for  $c_p^l$ ,  $c_p^s$  and  $\Delta h_t$  as given in the date sheet.

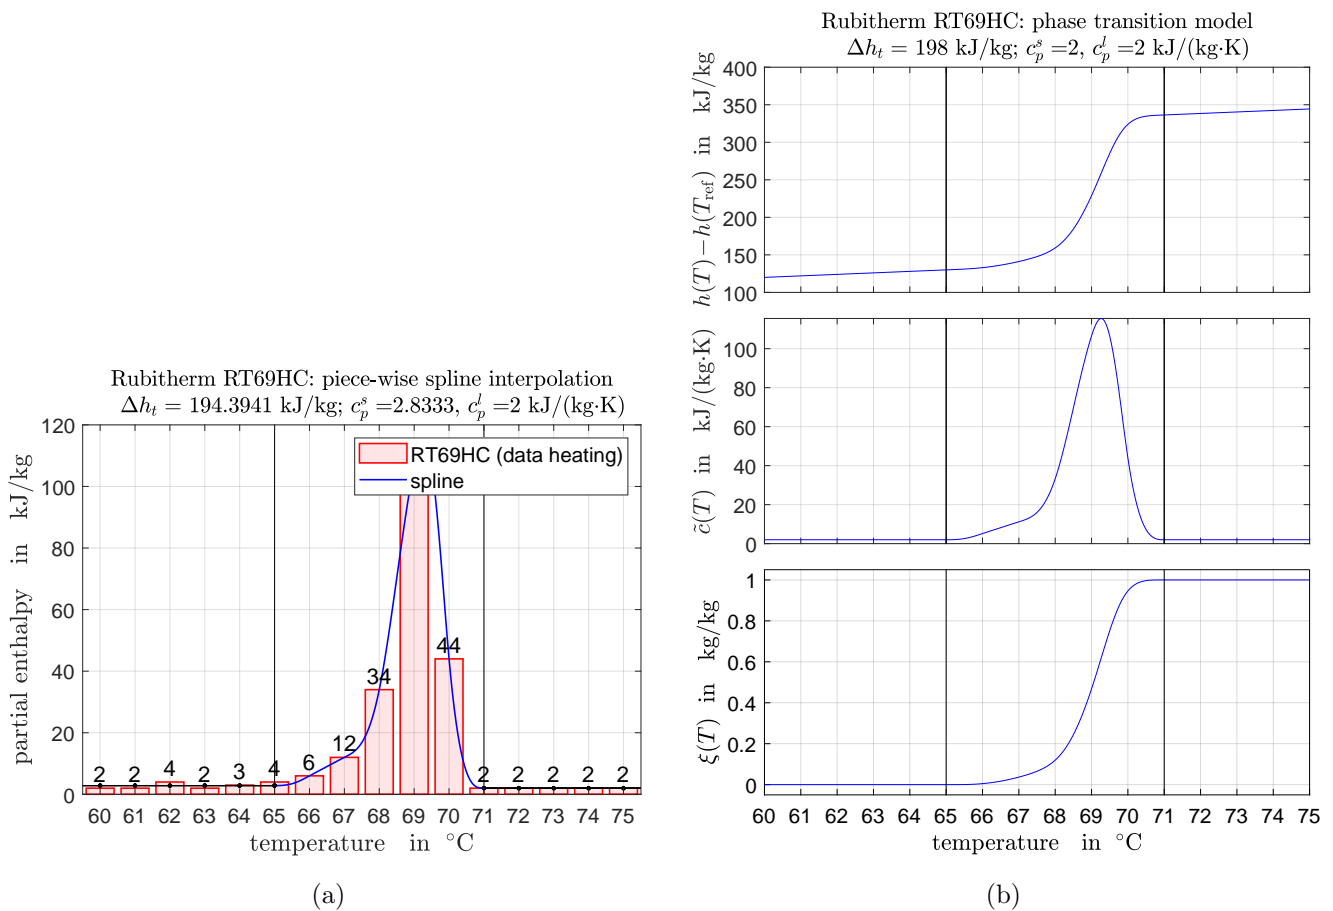

Figure 38: Identified phase transition models for heating for Rubitherm RT69HC.

<sup>1</sup>Barz, T.; Krämer, J.; Emhofer, J. Identification of Phase Fraction–Temperature Curves from Heat Capacity Data for Numerical Modeling of Heat Transfer in Commercial Paraffin Waxes. *Energies* **2020**, *13*, 5149.

## Rubitherm RT70HC

The heat capacity data is taken from the PCM's datasheet provided by Rubitherm GmbH (Berlin, Germany). The data was generated by 3-layer-calorimetry and is given as stored heat in 1.0 K intervals (first figure). Spline interpolation is used to identify the phase fraction-temperature function  $\xi(T)$ . The phase transition model (second figure) uses the values for  $c_p^l$ ,  $c_p^s$  and  $\Delta h_t$  as given in the date sheet.

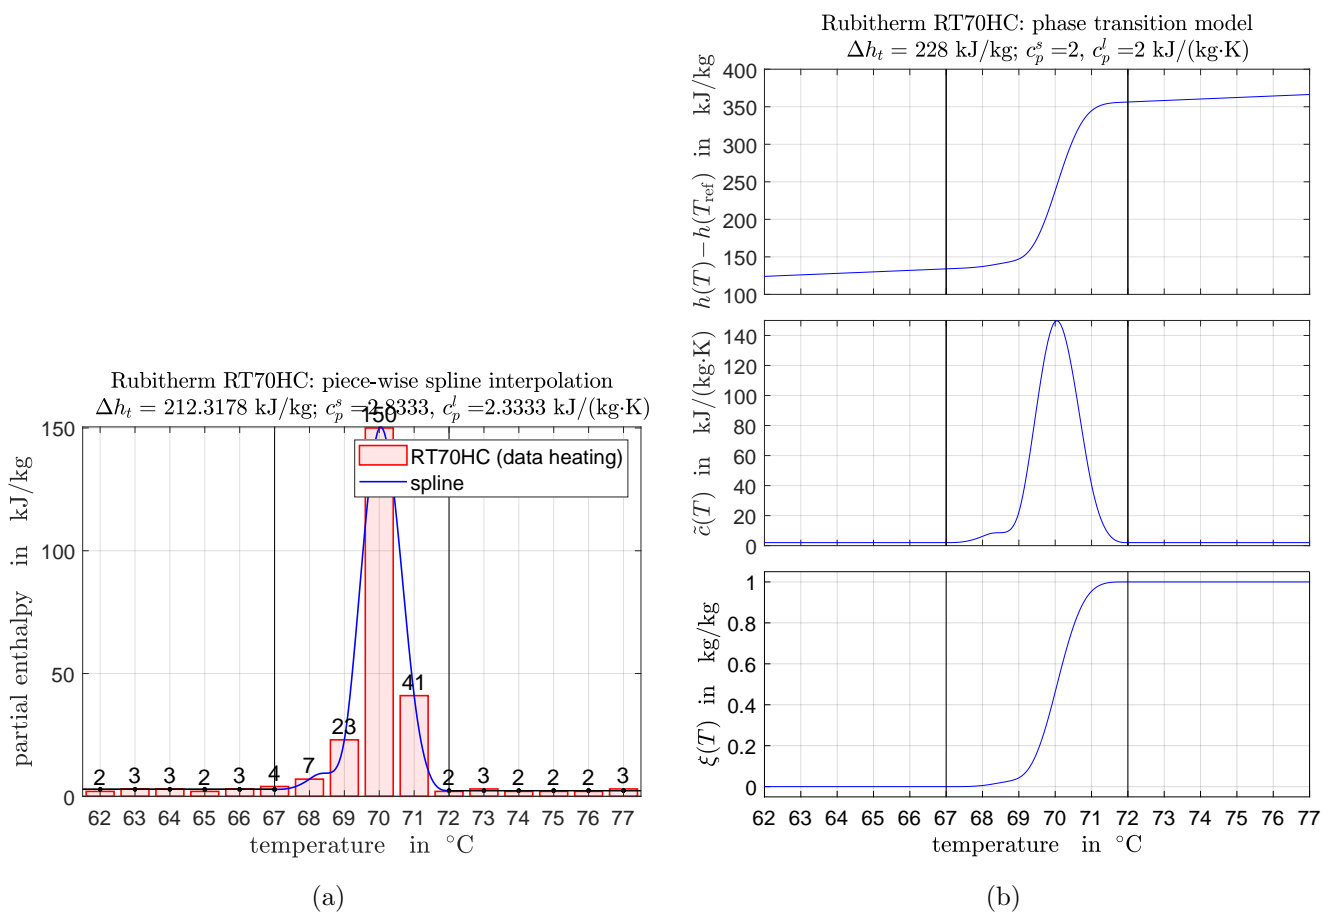

Figure 39: Identified phase transition models for heating for Rubitherm RT70HC.

<sup>1</sup>Barz, T.; Krämer, J.; Emhofer, J. Identification of Phase Fraction–Temperature Curves from Heat Capacity Data for Numerical Modeling of Heat Transfer in Commercial Paraffin Waxes. *Energies* **2020**, *13*, 5149.

## Rubitherm RT80HC

The heat capacity data is taken from the PCM's datasheet provided by Rubitherm GmbH (Berlin, Germany). The data was generated by 3-layer-calorimetry and is given as stored heat in 1.0 K intervals (first figure). Spline interpolation is used to identify the phase fraction-temperature function  $\xi(T)$ . The phase transition model (second figure) uses the values for  $c_p^l$ ,  $c_p^s$  and  $\Delta h_t$  as given in the date sheet.

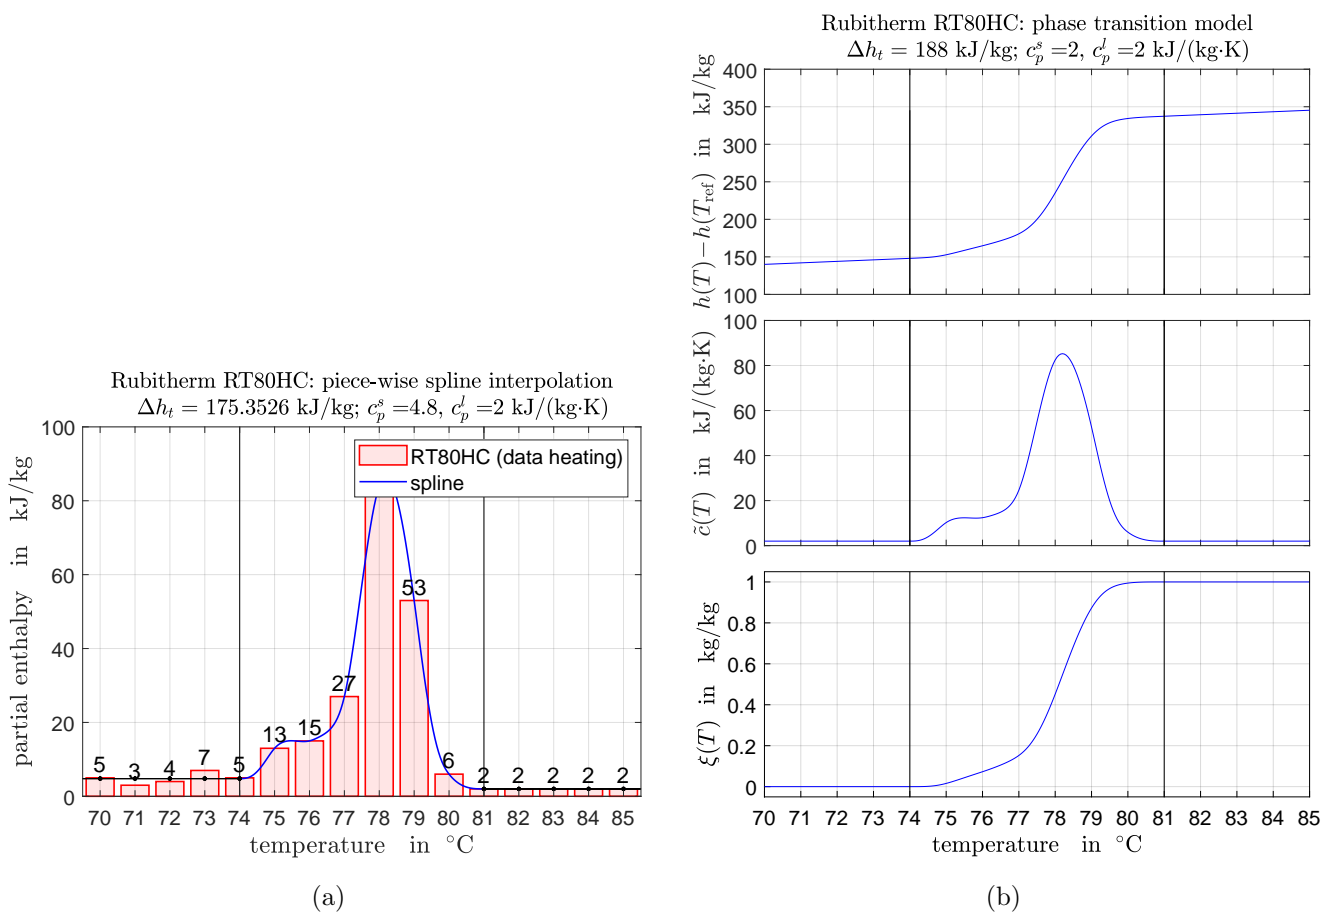

Figure 40: Identified phase transition models for heating for Rubitherm RT80HC.

<sup>1</sup>Barz, T.; Krämer, J.; Emhofer, J. Identification of Phase Fraction–Temperature Curves from Heat Capacity Data for Numerical Modeling of Heat Transfer in Commercial Paraffin Waxes. *Energies* **2020**, *13*, 5149.



## Rubitherm RT82

The heat capacity data is taken from the PCM's datasheet provided by Rubitherm GmbH (Berlin, Germany). The data was generated by 3-layer-calorimetry and is given as stored heat in 1.0 K intervals (first figure). Spline interpolation is used to identify the phase fraction-temperature function  $\xi(T)$ . The phase transition model (second figure) uses the values for  $c_p^l$ ,  $c_p^s$  and  $\Delta h_t$  as given in the date sheet.

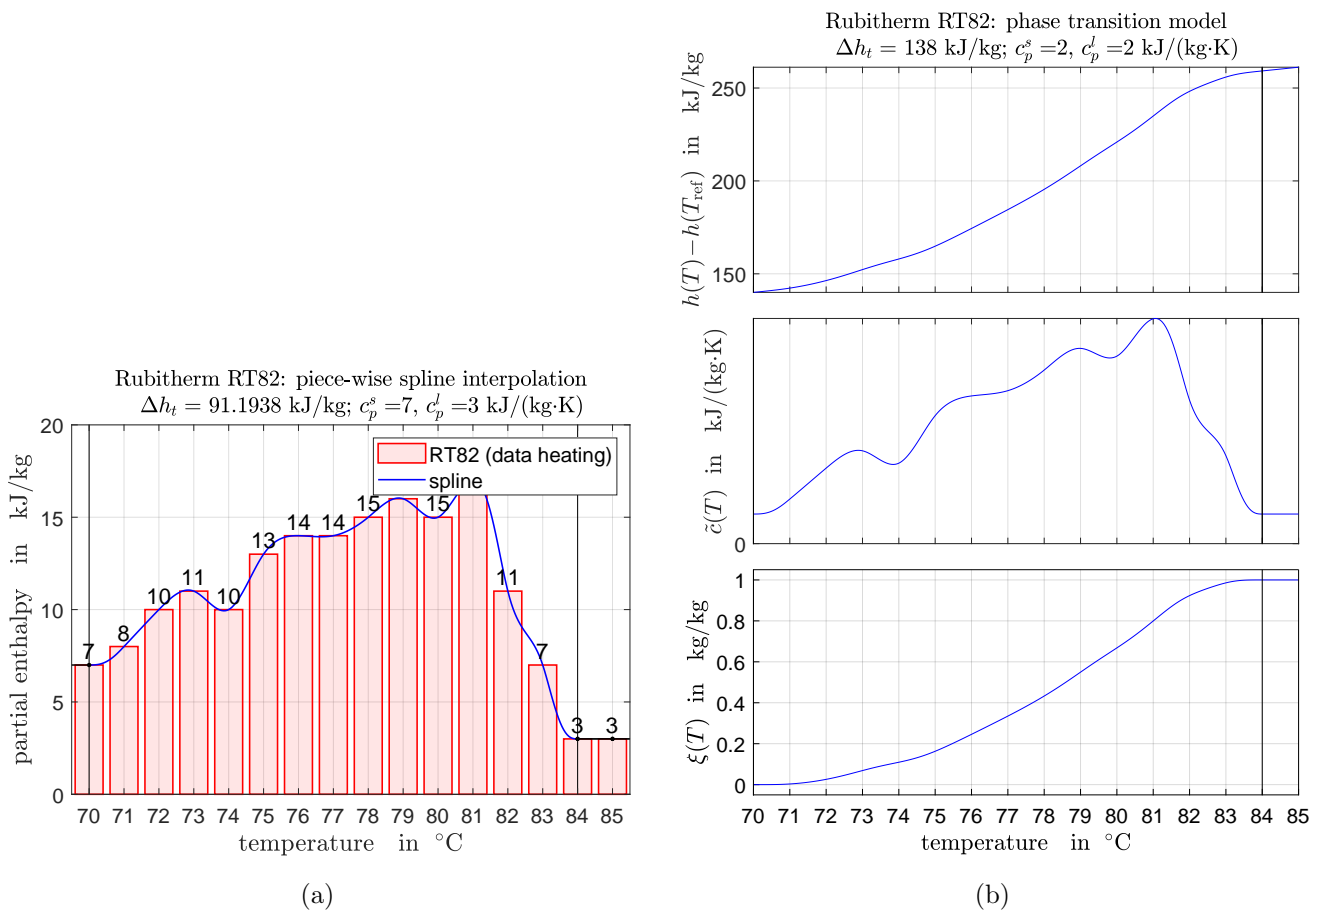

Figure 41: Identified phase transition models for heating for Rubitherm RT82.

<sup>1</sup>Barz, T.; Krämer, J.; Emhofer, J. Identification of Phase Fraction–Temperature Curves from Heat Capacity Data for Numerical Modeling of Heat Transfer in Commercial Paraffin Waxes. *Energies* **2020**, *13*, 5149.

## Rubitherm RT90HC

The heat capacity data is taken from the PCM's datasheet provided by Rubitherm GmbH (Berlin, Germany). The data was generated by 3-layer-calorimetry and is given as stored heat in 1.0 K intervals (first figure). Spline interpolation is used to identify the phase fraction-temperature function  $\xi(T)$ . The phase transition model (second figure) uses the values for  $c_p^l$ ,  $c_p^s$  and  $\Delta h_t$  as given in the date sheet.

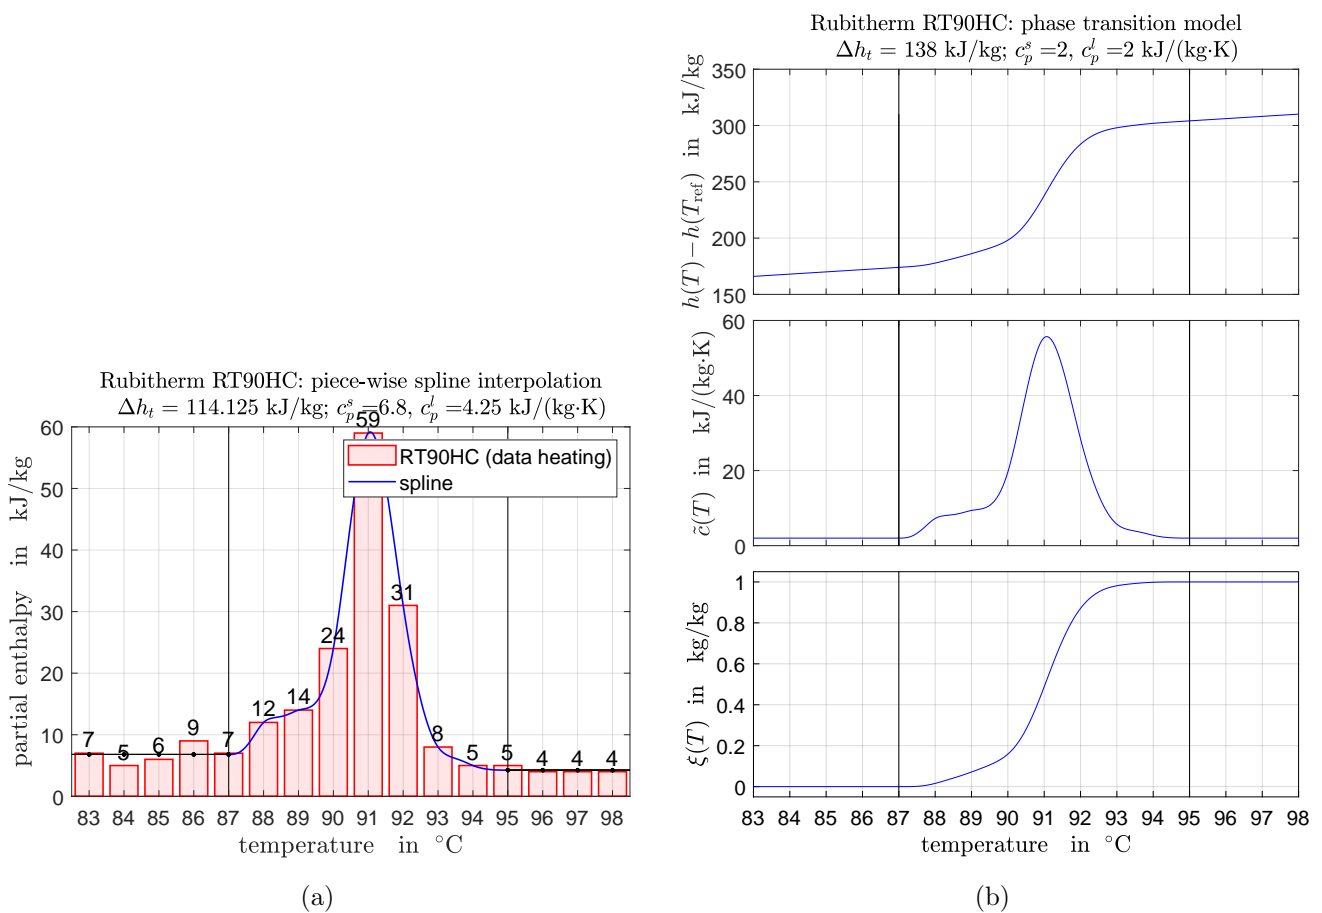

Figure 42: Identified phase transition models for heating for Rubitherm RT90HC.

<sup>1</sup>Barz, T.; Krämer, J.; Emhofer, J. Identification of Phase Fraction–Temperature Curves from Heat Capacity Data for Numerical Modeling of Heat Transfer in Commercial Paraffin Waxes. *Energies* **2020**, *13*, 5149.

## Rubitherm RT100

The heat capacity data is taken from the PCM's datasheet provided by Rubitherm GmbH (Berlin, Germany). The data was generated by 3-layer-calorimetry and is given as stored heat in 1.0 K intervals (first figure). Spline interpolation is used to identify the phase fraction-temperature function  $\xi(T)$ . The phase transition model (second figure) uses the values for  $c_p^l$ ,  $c_p^s$  and  $\Delta h_t$  as given in the date sheet.

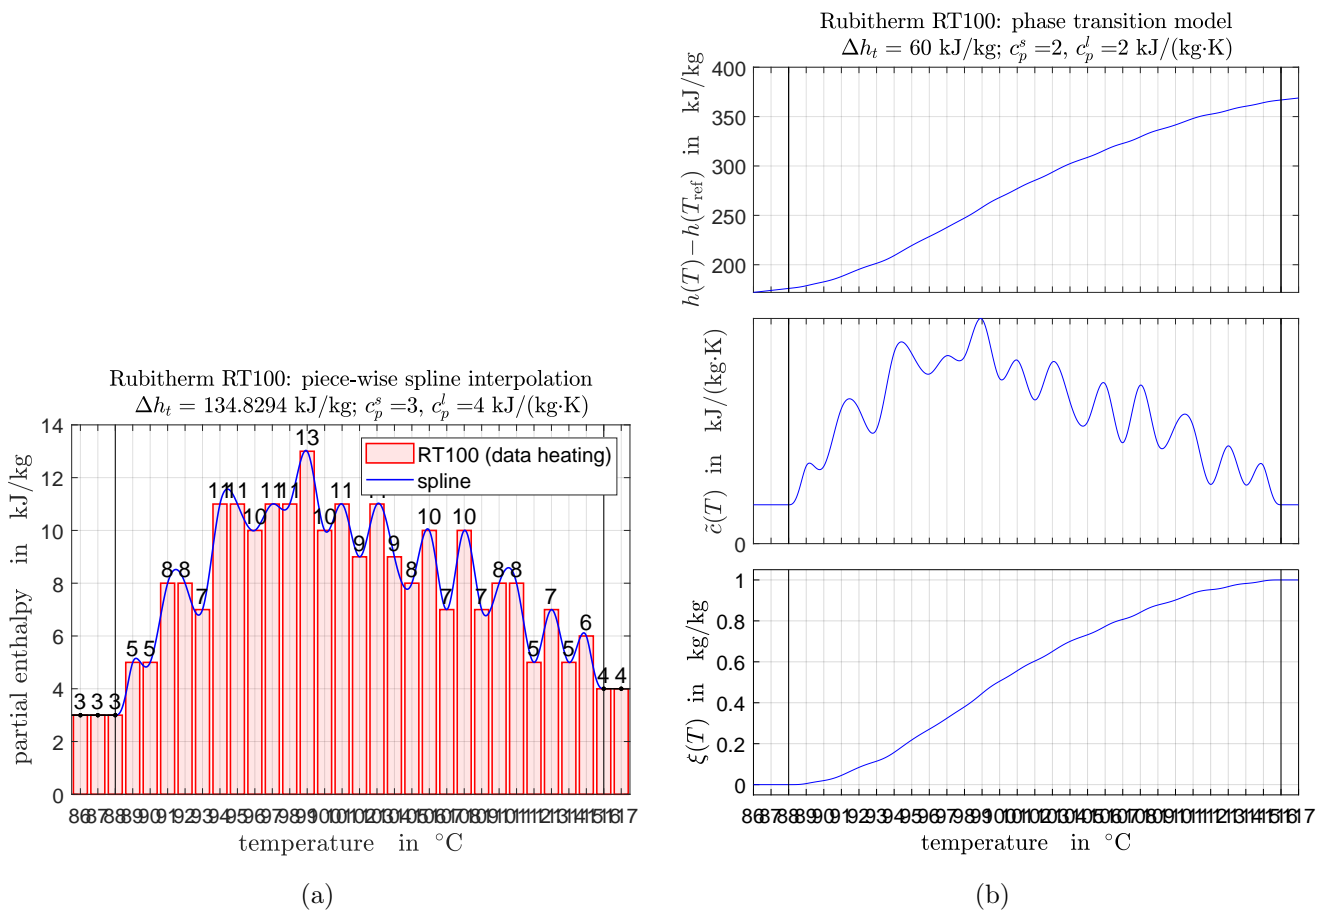

Figure 43: Identified phase transition models for heating for Rubitherm RT100.

<sup>1</sup>Barz, T.; Krämer, J.; Emhofer, J. Identification of Phase Fraction–Temperature Curves from Heat Capacity Data for Numerical Modeling of Heat Transfer in Commercial Paraffin Waxes. *Energies* **2020**, *13*, 5149.

## Rubitherm RT100HC

The heat capacity data is taken from the PCM's datasheet provided by Rubitherm GmbH (Berlin, Germany). The data was generated by 3-layer-calorimetry and is given as stored heat in 1.0 K intervals (first figure). Spline interpolation is used to identify the phase fraction-temperature function  $\xi(T)$ . The phase transition model (second figure) uses the values for  $c_p^l$ ,  $c_p^s$  and  $\Delta h_t$  as given in the date sheet.

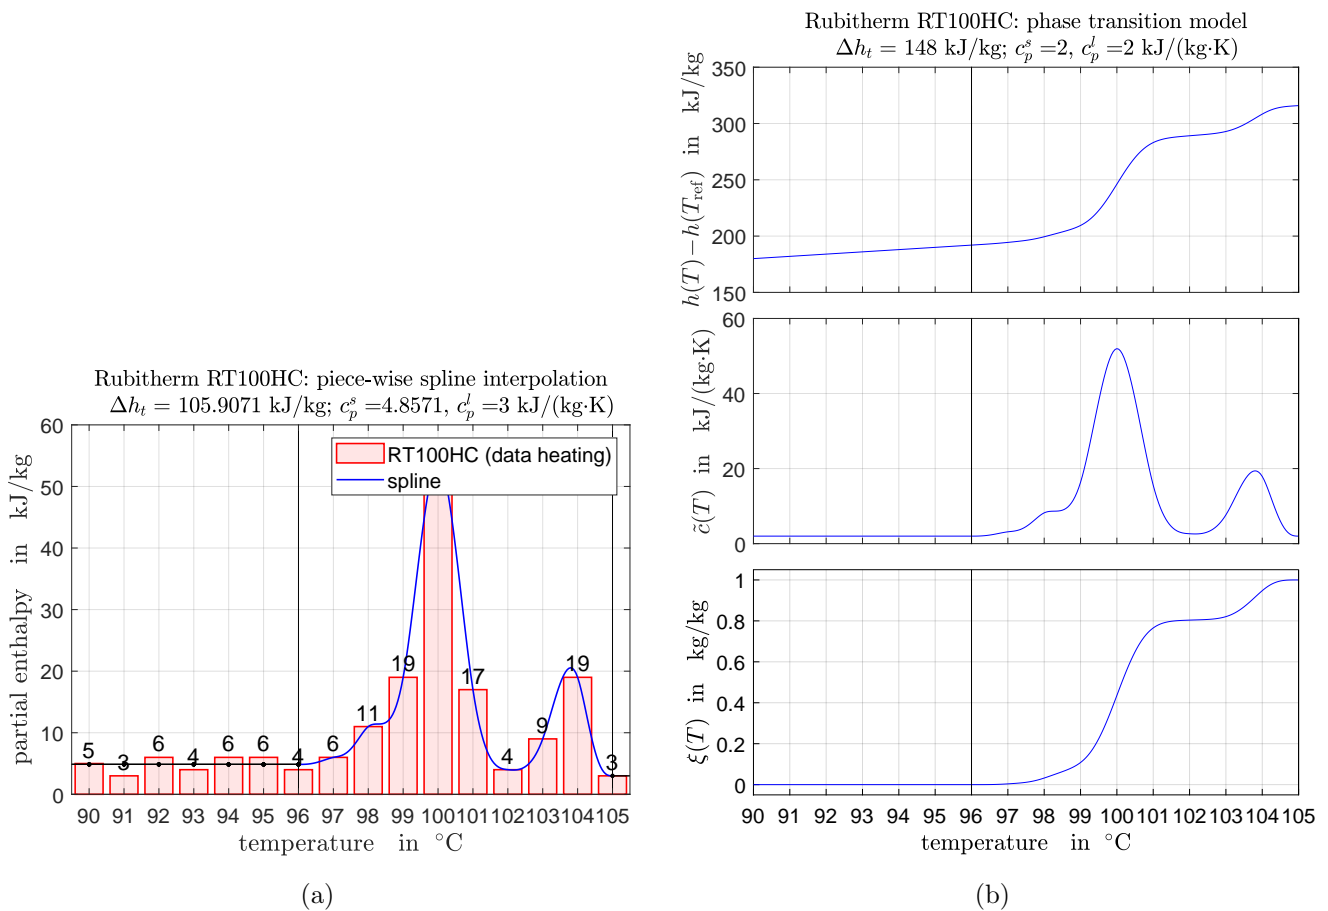

Figure 44: Identified phase transition models for heating for Rubitherm RT100HC.

<sup>1</sup>Barz, T.; Krämer, J.; Emhofer, J. Identification of Phase Fraction–Temperature Curves from Heat Capacity Data for Numerical Modeling of Heat Transfer in Commercial Paraffin Waxes. *Energies* **2020**, *13*, 5149.
