# Supplementary material
Source: MDPI journal article supplement (https://www.mdpi.com/1996-1073/13/19/5149)
Supplement: s1 [file s1]

Archive with 49 entries (47 files):
- suppl/
- suppl/publicMatlabCode/
- suppl/publicMatlabCode/evaluateSplines.m
- suppl/publicMatlabCode/main_plotPhaseTrans.m
- suppl/publicMatlabCode/RT-4.mat
- suppl/publicMatlabCode/RT-9HC.mat
- suppl/publicMatlabCode/RT0.mat
- suppl/publicMatlabCode/RT10.mat
- suppl/publicMatlabCode/RT100.mat
- suppl/publicMatlabCode/RT100HC.mat
- suppl/publicMatlabCode/RT10HC.mat
- suppl/publicMatlabCode/RT11HC.mat
- suppl/publicMatlabCode/RT12.mat
- suppl/publicMatlabCode/RT15.mat
- suppl/publicMatlabCode/RT18HC.mat
- suppl/publicMatlabCode/RT21.mat
- suppl/publicMatlabCode/RT21HC.mat
- suppl/publicMatlabCode/RT22HC.mat
- suppl/publicMatlabCode/RT24.mat
- suppl/publicMatlabCode/RT25HC.mat
- suppl/publicMatlabCode/RT26.mat
- suppl/publicMatlabCode/RT28HC.mat
- suppl/publicMatlabCode/RT2HC.mat
- suppl/publicMatlabCode/RT31.mat
- suppl/publicMatlabCode/RT35.mat
- suppl/publicMatlabCode/RT35HC.mat
- suppl/publicMatlabCode/RT3HC.mat
- suppl/publicMatlabCode/RT4.mat
- suppl/publicMatlabCode/RT42.mat
- suppl/publicMatlabCode/RT44HC.mat
- suppl/publicMatlabCode/RT47.mat
- suppl/publicMatlabCode/RT5.mat
- suppl/publicMatlabCode/RT50.mat
- suppl/publicMatlabCode/RT54HC.mat
- suppl/publicMatlabCode/RT55.mat
- suppl/publicMatlabCode/RT5HC.mat
- suppl/publicMatlabCode/RT60.mat
- suppl/publicMatlabCode/RT62HC.mat
- suppl/publicMatlabCode/RT64HC.mat
- suppl/publicMatlabCode/RT65.mat
- suppl/publicMatlabCode/RT69HC.mat
- suppl/publicMatlabCode/RT70HC.mat
- suppl/publicMatlabCode/RT8.mat
- suppl/publicMatlabCode/RT80HC.mat
- suppl/publicMatlabCode/RT82.mat
- suppl/publicMatlabCode/RT8HC.mat
- suppl/publicMatlabCode/RT9.mat
- suppl/publicMatlabCode/RT90HC.mat
- suppl/supplementaryInfoRubithermData.pdf
